# Supplementary material for: Restriction Profiling of 23S Microheterogenic Ribosomal Repeats for Detection and Characterizing of E. coli and Their Clonal, Pathogenic, and Phylogroups
Source: J Pathog. 2015 Dec 22;2015:562136. doi: 10.1155/2015/562136 (PMC4738725; doi:10.1155/2015/562136)
Supplement: Supplementary file 1 — The description of the supplementary material is with respect to genome name, the serotype, number of plasmids, accession number of genome data, GC content, sequencing center and source of sample for both candidate and non-candidate genomes used for this study has been listed in this spread sheet. [file 562136.f1.xlsx]

## Sheet: A.1
Supplementary data A 1
List of Candidate and Reference strains that were extrapolated from NCBI for genome analysis(uploaded till 11th April 2013)
SN		Genome	PG	PL	RefSeq	INSDC	Size	GC%	Nature	Sequencing centrea
Nonpathogenic/Commensal strains
1	K12	K-12 substr. MG1655 (016:H48)	A	0	NC_000913.2	U00096.2	4639675 bp (4.64)	50.8	Model strain substrain of K-12	Uty Wisconsin,USA
2	K12	K-12 substr. W3110	A	0	NC_007779.1	AP009048.1	4646332 bp (4.65)	50.8	Sub-strain of K-12	NAIST,Japan
3	K12	K-12 substr. DH10B	A	0	NC_010473.1	CP000948.1	4686137 bp (4.69)	50.8	Derivative (D/) of K-12	Uty Wisconsin,USA
4	K12	DH1	A	0	NC_017625.1	CP001637.1	4630707 bp (4.63)	50.8	Derivative of MM294	US DOE JGI,USA
5	K12	DH1 (ME8569)	A	0	NC_017638.1	AP012030.1	4621430 bp (4.62)	50.8	Derivative of MM294	Osaka Uty,Japan
6	K12	BW2952	A	0	NC_012759.1	CP001396.1	4578159 bp (4.58)	50.8	Derivative of MC4100	Nankai Uty,China
7	K12	P12b(015:H7)	A	0	NC_017663.1	CP002291.1	4935294 bp(4.9)	50.9	Typical H17 bacterial strain	Nankai Uty,China
8	Crooks	ATCC 8739	A	0	NC_010468.1	CP000946.1	4746218 bp (4.75)	50.9	strain to check efficiency of antimicrobial agents	U-DOE JGI,USA
9	Waksman	W	B1	2	NC_017635.1	CP002185.1	4900968bp (4.9)	50.8	Soil isolate cemetery near Rutgers Uty	Uty Queensland,Australia
10	Waksman	W	B1	2	NC_017664.1	C0002967.1	4897452 bp (4.9)	50.8	Soil isolate cemetery near Rutgers Uty	Uty Florida,USA
11	D/ Waksman	KO11FL	B1	2	NC_016902.1	CP002516.1	4920168 bp (4.92)	50.8	Engineered ethanologenic W strain	U-DOE JGI,USA
12	D/Waksman	KO11FL	B1	1	NC_017660.1	CP002970.1	5021812 bp (5.0)	50.8	Engineered ethanologenic W strain	Uty Florida,USA
13	B	B str. REL606	A	0	NC_012967.1	CP000819.1	4629812 bp (4.63)	50.8	Microbial evolution tudies	Genoscope,France
14	B	BL21-Gold(DE3)pLysS AG	A	0	NC_012947.1	CP001665.1	4570938 bp (4.57)	50.8	Recombinant protein expression	U-DOE JGI
15	B	BL21(DE3)_1	A	0	NC_012971.2	CP001509.3	4558953 bp (4.56)	50.8	Same as above	KRIBB, South Korea
16	B	BL21(DE3)_2	A	0	NC_012892.2	AM946981.2	4558947 bp (4.56)	50.8	Same as above	ACBT,Austria
17	COM	IAI1(O8)	B1	0	NC_011741.1	CU928160.2	4700560 bp (4.7)	50.8	Feces healthy french man 1980s	Genoscope,France
18	COM	HS(O9:H4)	A	0	NC_009800.1	CP000802.1	4643538 bp (4.64)	50.8	Feces;lab scientist WRAIR in 1978	TIGR,USA
19	COM	SE11(O150:H28)	B1	0	NC_011415.1	AP009240.1	4887515 bp (4.89)	50.8	Feces from a healthy adult	Kitasato Uty,Japan
20	COM	SE15(O150:H6)	B2	1	NC_013654.1	AP009378.1	4717338 bp (4.72)	50.7	Feces from a healthy adult	Kitasato Uty,Japan
21	COM	ED1a(O81)	B2	0	NC_011745.1	CU928162.2	5209548 bp (5.21)	50.7	Feces; healthy adult devoid of no antibiotics for 6 mon	Genoscope,France
Pathogenic strains
22	EIEC	str. NRG 857C(O83:H1 )	B2	1	NC_017634.1	CP001855.1	4747819 bp (4.75)	50.7	Crohm's patient	PHAC,Canada
23	EIEC	LF82	B2	0	NC_011993.1	CU651637.1	4630707 bp (4.77)	50.7	Crohm's patient	Genoscope,France
24	EIEC	UM146	B2	2	NC_011751.1	CP002167.1	4993013 bp (4.99)	50.6	Crohm's patient	RTL,USA
25	EHEC	str. 11368(O26:H11)	B1	4	NC_013361.1	AP010953.1	5697240 bp (5.7)	50.7	Sporadic cases diarrhea and bloody stool,Japan 2001	Uty Tokyo,Japan
26	EHEC	str. 12009(O103:H2)	B1	1	NC_013353.1	AP010958.1	5449314 bp (5.45)	50.7	Same as above	Uty Tokyo,Japan
27	EHEC	str. 11128(O111:H-)	B1	5	NC_013364.1	AP010960.1	5371077 bp (5.37)	50.6	Same as above	Uty Tokyo,Japan
28	EPEC	str. E2348/69(O127:H6)	B2	2	NC_011601.1	FM180568.1	4965553 bp (4.97)	50.6	infantile diarrhea, Taunton, UK, 1969	WT /SI ,UK
29	EPEC	str. CB9615(O55:H7)	E	1	NC_013941.1	CP001846.1	5386352 bp (5.39)	50.5	Diarrhoea, Germany, 2003 Precursor of O157	Nankai Uty,China
30	EPEC	str. RM12598(O55:H7)	E	5	NC_017656.1	CP003109.1	5263980bp (5.3)	50.4	Diarrhoea,California 1974, Precursor of O157	WRRC,USA
31	EPEC	str. EDL933(O157:H7)	E	2	NC_002655.2	AE005174.2	5528445 bp (5.53)	50.4	diarrhoea, US outbreak, 1982	Uty Wisconsin,USA
32	EPEC	str. EC4115(O55:H7)	E	2	NC_011353.1	CP001164.1	5572075 bp (5.57)	50.5	Spinach/outbreak in western states in 2006	JCVI,USA
33	EPEC	str. Sakai(O157:H7)	E	2	NC_002695.1	BA000007.2	5498450 bp (5.5)	50.5	outbreak 1996 in primary schools of Sakai City, Osaka	Osaka Uty,Japan
34	EPEC	str. TW14359(O157:H7)	E	1	NC_013008.1	CP001368.1	5528136 bp (5.53)	50.5	Spinach/outbreak in western states in 2006	Uty Washington,USA
35	EPEC	Xuzhou21(O157:H7)	E	2	NC_017906.1	CP001925.1	5386223 bp (5.38)	50.4	diarrhoea, 1999 china	NICD,China
SN		Genome	PG	PL	RefSeq	INSDC	Size	GC%	Nature	Sequencing centre
36	UPEC	ABU 83972	B2	1	NC_017631.1	CP001671.1	5131397 bp (5.13)	50.6	Asymptomatic bacteriuria (ABU)	Uty Goettingen, Germany
37	UPEC	NA114	B2	0	NC_017644.1	CP002797.1	4935241bp (4.94)	51.2	Multidrug resistant uropathogenic sample	Uty Hyderabad,India
38	UPEC	536	B2	0	NC_008253.1	CP000247.1	4938920 bp (4.94)	50.8	Wild-type UPEC strain;pyelonephritis	Uty Goettingen, Germany
39	UPEC	UTI89(O6:K15:H31)	B2	1	NC_007946.1	CP000243.1	5065741 bp (5.07)	50.6	Uropathogenic strain	Uty Washington,USA
40	UPEC	CFT073 (O6:K2:H1)	B2	0	NC_004431.1	AE014075.1	5231428 bp (5.23)	50.5	urosepsis isolate	Uty Wisconsin,USA
41	UPEC	IAI39(O7:K1)	D	0	NC_011750.1	CU928164.2	5132068 bp (5.13)	50.6	urine/ pyelonephritis in the 1980s in France	Genoscope,France
42	UPEC	clone D i2	B2	0	NC_017651.1	CP002211.1	5038386 bp (5.04)	50.6	Rates of Mutation & Host Transmission (3 Yrs)	Nankai Uty,China
43	UPEC	clone D i14	B2	0	NC_017652.1	CP002212.1	5038386 bp (5.04)	50.6	Same as above	Nankai Uty,China
44	ExPEC	S88(O45:K1:H7)	B2	1	NC_011742.1	CU928161.2	5032268 bp (5.03)	50.7	late-onsetneonatal meningitis from newborn France 1999	Genoscope,France
45	ExPEC	IHE3034(O18:K1:H7)	B2	0	NC_017628.1	CP001969.1	5108383 bp (5.11)	50.7	Neonatal meningitis Finland 1976	IMIB,Germany
46	ExPEC	str. CE10(O7:K1 )	D	4	NC_017646.1	CP003034.1	5313531 bp (5.31)	50.6	Meningitis isolate	IPB,China
47	ExPEC	UMN026(O17:K52:H18)	D	2	NC_011751.1	CU928163.2	5202090 bp (5.2)	50.7	Uncomplicated acute cystitis in 1999, USA	Genoscope,France
48	APEC	APEC O1(O1:K1)	B2	2	NC_008563.1	CP000468.1	5082025 bp (5.08)	50.5	lung of a chicken with colisepticemia	Iowa Uty,USA
49	EAEC	42	D	1	NC_017626.1	FN554766.1	5241977 bp (5.24)	50.6	volunteer group, 1955 study prototypical Enter aggressive	WT/SI,UK
50	EAEC	55989	B1	0	NC_011748.1	CU928145.2	5154862 bp (5.15)	50.7	Diarrheagenic HIV-positive adult,Africa	PI & Genoscope,France
51	EAEC	str. 2009EL-2050(0104:H4 )	B1	3	NC_018650.1	CP003297.1	5253138 bp (5.2)	50.7	Republic of Georgia outbreak, 2009	LANL, ISA
52	EAEC	str. 2009EL-2071(0104:H4 )	B1	2	NC_018661.1	CP003301.1	5312586 bp(5.3)	50.7	Same as above	LANL, ISA
53	EAEC	str. 2011-3493(0104:H4 )	B1	3	NC_018658.1	CP003289.1	5273097 bp (5.3)	50.6	US patient with a history of travel to Germany	LANL, ISA
54	ETEC	ETEC H10407(O78:H11:K80)	B2	4	NC_017633.1	FN649414.1	5153435 bp (5.15)	50.8	Prototypic Enterotoxigenic strain;adult with cholera-like symptoms Dacca, Bangladesh, prior to 1973	WT/SI,UK
55	ETEC	E24377A(O139:H28)	B1	6	NC_009801.1	CP000800.1	4979619 bp (4.98)	50.6	Watery diarrhoea,Maj Carl Brinkley, WRAIRb	TIGR,USA
56	ETEC	UMNK88(O149)	A	5	NC_017641.1	CP002729.1	5186416 bp (5.19)	50.7	porcine neonatal diarrhea	Uty Minnesota,USA
57	ENV	SMS-3-5	D	4	NC_010498.1	CP000970.1	5068389 bp (5.07)	50.5	Shipyard Creek,USA,Toxic chemical contaminanted coastal env, Antibiotic resistant strain	TIGR,USA
Non-candidate strains
1	Citrobacter koseri ATCC BAA-895			2	NC_009792.1	CP000822.1	4720462 bp (4.7)	53.8	Neonatal meningitis,CDC,CSPb	GSC,USA
2	Klebsiella pneumoniae subsp.pneum MGH 78578			5	NC_009648.1	CP000647.1	5315120 bp (5.3)	57.2	KSPb	GSC,USA
3	Klebsiella pneumoniae subsp.pneum NTUH-K2044			1	NC_012731.1	AP006725.1	5248520 bp (5.2)	57.4	liver abscess and meningitis,KSP	VYM,China
4	Enterobacter aerogenes KCTC 2190			-	NC_015663.1	CP0002824.1	5280350 bp (5.3)	54.8		LSI,Korea
COM:Commensal; D/: Derivative; APEC: Avian pathogenic E. coli; EAEC: Enteroaggresive E.coli;EHEC: Enterohemorrhagic E. coli; EIEC: Enteroinvasive E.coli;EPEC: Enteropathogenci E. coli; ETEC: Enterotoxigenic E. coli; ExPEC: Extraintestinal Pathogenic E. coli; UPEC: Uropathogenic E. coli; ENV: Enivironmental; aUniveristy (Uty);Nara Institute od Science and Technology (NAIST); US -DOE Joint Genome I…

## Sheet: A.2
Supplementary data A2
List of restriction enzymes screened for this study
SINGLE GROUPS				ISOCHIZOMERS GROUPS					COGNATE & NON-COGNATE GROUPS
S	E	RE/S	S	E	RE/S	S	E	RE/S	S	E	RE/S
1	AatII	GACGT/C	25	AanI,PsiI	TTA/TAA	50	EagI ,EclXI Eco521,XmaIII	C/GGCCG	74	Acc65I ,Asp718	G/GTACC
2	AluI	AG/CT	26	AatI,Eco 1471, StuI	AGG/CCT	51	Eco47III,AfeI	AGC/GCT		KpnI	GGTAC/C
3	Bamh1	G/GATCC	27	AccIII,BseAI , BspEI , Bsp MII, Kpn 21, MroI	T/CCGGA	52	EcoRV,Eco321	GAT/ATC	75	ApaI	GGGCC/C
4	BclI	T/GATCA	28	AflII,Bfr1, BspTI	C/TTAAG	53	HaeIII,BsuRI	GG/CC		Bsp1201,PspOMI	G/GGCCC
5	BglII	A/GATCT	29	AgeI,PinAI,BshT1	A/CCGGT	54	HpaI,KspA1	GTT/AAC	76	BspO1,BmtI	GCTAG/C
6	EcoRI	G/AATTC	30	AjiI,BmgBI	CAC/GTC	55	HpaII,MspI	C/CGG		NheI	G/CTAGC
7	FseI	GGCCGG/CC	31	AhaIII,DraI	TTT/AAA	56	KasI,SspDI	G/GCGCC	77	CfoI,HhaI	GCG/C
8	HindIII	A/AGCTT	32	Alw44I,ApaLI,SnoI	G/TGCAC	57	KspI,Cfr 421, SacII,SstII	CCGC/GG		Hin61,HinP1L	G/CGC
9	MauB1	CG/CGCGCG	33	AosI,AviII AvrII,Fsp1,MstI, NsbI	TGC/GCA	58	MfeI,MunI	C/AATTG	78	Csp61,CviQ1	G/TAC
10	MluI	A/CGCGT	34	AscI,SgsI	GG/CGCGCC	59	MreI,Sse2321	CG/CCGGCG		RsaI	GT/AC
11	NcoI	C/CATGG	35	AseI ,AsnI,VspI	AT/TAAT	60	MseI,Tru91	T/TAA	79	EheI,SfoI	GGC/GCC
12	NdeI	CA/TATG	36	AsuII,BstB1,NspV,SfuI, Bsp1191	TT/CGAA	61	NlaIII,Hin1II	CATG/		NarI	GG/CGCC
13	NotI	GC/GGCCGC	37	AvrII,BinI,XmaJI	C/CTAGG	62	NruI,Bsp681	TCG/CGA	80	Ecl136II,EcolCRI	GAG/CTC
14	PacI	TTAAT/TAA	38	BalI,MluNI,MscI,MIsI	TGG/CCA	63	NsiI,Mph11031	ATGCA/T		SacI,SstI	GAGCT/C
15	PstI	CTGCA/G	39	BbrPI,Eco721, PmaCI ,PmlI	CAC/GTG	64	PaeR7I,XhoI	C/TCGAG	81	MaeII	A/CGT
16	PvuI	CGAT/CG	40	BfaI,MaeI,FspBI, RmaI	C/TAG	65	PmeI,MssI	GTTT/AAAC		TaiI	ACGT/
17	PvuII	CAG/CTG	41	BsePI,BssHII,PauI	G/CGCGC	66	Psp1406I ,AcII	AA/CGTT	82	SmaI	CCC/GGG
18	SalI	G/TCGAC	42	BsiWI , Pfl23II,SpII	C/GTACG	67	SfaAI,SgfI	GCGAT/CGC		XmaI,Cfr91, SmaI, XmaCI	C/CCGGG
19	ScaI	AGT/ACT	43	Bsp1407I,BsrGI, SspB1	T/GTACA	68	SnaBI,Eco1051	TAC/GTA	83	NaeI,PdiI	GCC/GGC
20	SrfI	GCCC/GGGC	44	BspDI,Bsu 151, ClaI	AT/CGAT	69	SpeI,BcuI	A/CTAGT		NgoMI	G/CCGGC
21	SgrDI	CG/TCGACG	45	BspHI,PagI, RcaI	T/CATGA	70	SphI,PaeI	GCATG/C	84	AciI	C/CGC
22	SspI	AAT/ATT	46	BspLU11I,PscI,PciI	A/CATGT	71	Sse8387I,SdbfI,SdaI	CCTGCA/GG	85	AciI	G/CGG
23	TaqI	T/CGA	47	Bst1107I,BstZ171,SnaI	GTA/TAC	72	SwaI,SmiI	ATTT/AAAT
24	XbaI	T/CTAGA	48	BstUI,FnuDII,MvnI,ThaI,Bsh12361	CG/CG	73	TasI,TspEI,Tsp5091	/AATT
			49	DpnII,Bsp1431,MboI,NdeIII,Sau3A1	/GATC
A total of 199 restriction enzymes of type II and IIe were segregated into 85 restriction groups; each corresponding to a specific recognition sequences. These restriction groups were further categorized into 49 isochizomeric groups (144 enzymes); 24 single recognition groups; 10 neoisochizomers (33 enzymes) and a single non-cognate group Isochizomers are enzymes that targets the same recognition…

## Sheet: A.3
Supplementary data A3
NUMBER & PREFERENCE OF RESTRICTION CUTS ACROSS rrlH OF THE CANDIDATE AND REFERENCE GENOME								Abbn: Abbreviation; RG: Restriction grps; IG: Isochizomers; SG: Single groups; NG: Neoisochizomers and C: Cognate and NC: Non-cognate groups* a single restriction enzyme that recognize two different enzymes Isochizomeric groups comprises of number of enzymes that recognize same enzymes; Single enzyme groups are categories that contain a single enzyme against a specific recognition sequence; Cogna…
Enzyme groups	Abb	RG	IG	SG	NG	NG	Total enzymes
					C	NC
Non-cutters	NC	42	23(62)	17	2(8)		87
Single preference	SP	4	2(5)	-	2(6)		11
Double preference	DP	6	4(13)	-	2(7)		20
Triple preference	TP	2	1(2)	-	1(3)		5
Common Cutters	CC	31*	19(58)	7*	3(9)	2*(1)	76*
Total		85	49(142)	24	10(33)	2	199
Categories	Enzymes
NC	AanI (PsiI), AatI (Eco 1471, StuI), AosI (AviII AvrII,Fsp1,MstI, NsbI) , AscI(SgsI), AseI (AsnI,VspI) , AsuII (BstB1,Bsp1191,NspV,SfuI), AvrII (BinI, XmaJI) , BsiWI(PfI23II, SpII), Bsp1407I (BsrG1,SspB1), BspLU1II (PscI,PciI), BspDI (Bsu 151,ClaI) , BspHI (PagI, RcaI), Eco47III (AfeI), EcoRV(Eco 321), EheI(Sfo I)*, KasI(SspDI), MfeI (MunI) , NsiI(Mph11031), NruI(Bsp681), PaeR7I (XhoI) , PmeI(MssI…
	AatII, BamHI, BclI, BglII, EcoRI, FseI, HindIII, MauBI, MluI, NarI*, NdeI, NotI, PacI, PstI, PvuI, ScaI, SmaI, SrfI, SgrDI, XbaI
SP	E	BsePI (BssHII )
	C	ApaI*, Bsp1201(PsopMI)*.MreI (Sse2321)
	EA	Acc65I (Asp718 )* , KpnI *
DP	E K	AccIII (BseAI , BspEI ,BspMII, Kpn 21, MroI ), AjiI (BmgBI)
	CEa	Alw44I (ApaLI, SnoI )
	EC	Ecl136II(EcolCRI)*, SacI (SstI )*
	KEa	NheI*, BspOI(BmtI)*
TP	CKEa	NaeI(PdiI), NgoMI
	ECK	SphI
CC	Different patterns	BfaI (MaeI, FspB1,RmaI ), BstUI (Bsh 12361,FbuDII, MvnI, ThaI ), CfoI (HhaI )*,Csp61( CviQI), HaeIII (BsuRI), Hin 61( HinIl) HpaII (MspI ), MseI (Tru91 ), NlaIII (Hin1II) ,TasI (TspE1,Tsp5091),
		AciI , AluI , RsaI*, TaqI
	Similar pattern	AflII (Bfr1, BspTI), AgeI (PinAI, BshTI), AhaIII (DraI), BalI (MluNI, MlsI,MscI), BbrPI (Eco721, PmaCI, PmlI), Bst1107I (BstZ171,SnaI), DpnII (Bsp1431,MboI, NdeIII, Sau3A1), EagI (Eco521,EclXI, XmaIII), EcoRI(KspAI), HpaI (KspA1), KspI (Cfr421,SacII, SstII), MaeII, NcoI, Psp1406I (AcII), PvuII, SalI, SnaBI (Eco1051), SspI, TaiI*
NC : Noncutters; SP: Single preferences; DP: Double preference; TP: Triple preference; CC: Common cutters.E: Escherichia coli; C: Citrobacter koseri; K: Klebsiella pneumoniae; Ea: Enterobacter aerogenes.Double and triple preference cutters are divided into categories of the strains they cut (e. g. EK means these enzymes show restriction sites in E. coli and K. pneumoniae).*Restriction enzymes tha…

## Sheet: A.4
Supplementary data A4
Location , amplicons and ARDRA sites with Bfa I of 23SP1 880 primers in Escherichia coli genomes
				E.coli(2904)								C.koseri								K.pneumoniae									E.aerogenes
	RE	RS	Fragments	b204	b3578	b3854	b3970	b4009	b2589	b3275		5140	1	2	3	4	5	6		218	2912	3678	4163	4260	4348	4391	4796		25005	25006	25008	25010	25012	25014	25016	25018
1	AciI	C/CGC	3.1																	621	621	621	621	621	621	621	621		621	621	620	622	622	622	621	622
			3.2	991	991	991	991	991	991	991		989	989	989	989	989	989	989			989	989	989	989	989	989	989		989	989	988	990	990	990	989	990
			3.3	1290	1290	1290	1290	1290	1290	1290		1287	1287	1287	1288	1287	1287	1287		1287	1287	1287	1287	1287	1287	1287	1287		1287	1287	1286	1288	1288	1288	1287	1288
			3.4					1867
			3.5	2044	2044	2044	2044	2044	2044	2044		2045	2045	2045	2046	2045	2045	2045		2042	2042	2042	2042	2042	2042	2042	2042		2044	2045	2043	2045	2045	2045	2045	2045
			3.6									2161	2161	2161	2162	2161	2161	2161
			3.7	2462	2462	2462	2462	2462	2462	2462		2463	2463	2463	2464	2463	2463	2463		2460	2460	2460	2460	2460	2460	2460	2460		2462	2463	2461	2463	2463	2463	2463	2463
2	AciI	G/CGG	4.1	245	245	245	245	245	245	245		244	244	244	244	244	244	244		245	245	245	245	245	245	245	245		245	245	245	245	245	245	245	245
			4.2	377	377	377	377	377	377	377		376	376	376	376	376	376	376		377	377	377	377	377	377	377	377		377	377	377	377	377	377	377	377
			4.3	757	757	757	757	757	757	757		755	755	755	755	755	755	755		755	755	755	755	755	755	755	755		755	755	754	756	756	756	755	756
			4.4	950	950	950	950	950	950	950		948	948	948	948	948	948	948		948	948	948	948	948	948	948	948		948	948	947	949	949	949	948	949
			4.5	1122	1122	1122	1122	1122	1122	1122		1120	1120	1120	1120	1120	1120	1120		1120	1120	1120	1120	1120	1120	1120	1120		1120	1120	1119	1121	1121	1121	1120	1121
			4.6	1160	1160	1160	1160	1160	1160	1160		1158	1158	1158	1158	1158	1158	1158		1158	1158	1158	1158	1158	1158	1158	1158		1158	1158	1157	1159	1159	1159	1158	1159
			4.7	1277	1277	1277	1277	1277	1277	1277		1274	1274	1274	1274	1274	1274	1274		1274	1274	1274	1274	1274	1274	1274	1274		1274	1274	1273	1275	1275	1275	1274	1275
			4.8																										1476	1476	1475	1477	1477	1477	1476	1477
			4.9		1731				1731	1731										1727	1727	1727	1727	1727	1727	1727	1727		1729	1730	1728	1730	1730	1730	1730	1730
			4.1										1871	1871	1872	1871		1871
			4.11	1904	1904	1904	1904	1904	1904	1904		1905	1905	1905	1905	1905	1905	1905		1902	1902	1902	1902	1902	1902	1902	1902		1904	1905	1903	1905	1905	1905	1905	1905
			4.12	2046	2046	2046	2046	2046	2046	2046		2047	2047	2047	2047	2047	2047	2047		2044	2044	2044	2044	2044	2044	2044	2044		2046	2047	2045	2047	2047	2047	2047	2047
			4.13	2221	2221	2221	2221	2221	2221	2221		2222	2222	2222	2222	2222	2222	2222		2219	2219	2219	2219	2219	2219	2219	2219		2221	2222	2220	2222	2222	2222	2222	2222
			4.14	2253	2253	2253	2253	2253	2253	2253		2254	2254	2254	2254	2254	2254	2254		2251	2251	2251	2251	2251	2251	2251	2251		2253	2254	2252	2254	2254	2254	2254	2254
			4.15	2485	2485	2485	2485	2485	2485	2485		2486	2486	2486	2486	2486	2486	2486		2483	2483	2483	2483	2483	2483	2483	2483		2485	2486	2484	2486	2486	2486	2486	2486
			4.16	2729	2729	2729	2729	2729	2729	2729		2730	2730	2730	2730	2730	2730	2730		2727	2727	2727	2727	2727	2727	2727	2727		2729	2730	2728	2730	2730	2730	2730	2730
3	AluI	AG/CT	10.1									155	155	155	155	155	155	155
			10.2									282	282	282	282	282	282	282		283	283	283	283	283	283	283	283		283	283	283	283	283	283	283	283
			10.3	363	363	363	363	363	363	363		362	362	362	362	362	362	362
			10.4	805	805	805	805	805	805	805		803	803	803	803	803	803	803		803	803	803	803	803	803	803	803		803	803	802	804	804	804	803	804
			10.5	822	822	822	822	822	822	822		820	820	820	821	820	820	820		820	820	820	820	820	820	820	820		820	820	819	821	821	821	820	821
			10.6	997	997	997	997	997	997	997		995	995	995	996	995	995	995		995	995	995	995	995	995	995	995		995	995	994	996	996	996	995	996
			10.7	1099	1099	1099	1099	1099	1099	1099		1099	1099	1099	1100	1099	1099	1099		1097	1097	1097	1097	1097	1097	1097	1097		1097	1096	1098	1098	1098	1098	1097	1098
			10.8	1157	1157	1157	1157	1157	1157	1157		1155	1155	1155	1156	1155	1155	1155		1155	1155	1155	1155	1155	1155	1155	1155		1155	1154	1156	1156	1156	1156	1155	1156
			10.9	1740	1740	1740	1740	1740	1740	1740		1739	1739	1739	1740	1739	1739	1739		1736	1736	1736	1736	1736	1736	1736	1736		1738	1739	1738	1739	1739	1739	1739	1739
			10.1	1763	1763	1763	1763	1762	1763	1763		1762	1762	1762	1763	1762	1762	1762		1759	1759	1759	1759	1759	1759	1759	1759		1761	1762	1760	1762	1762	1762	1762	1762
			10.11	1878	1878	1878	1878	1879	1878	1878		1879	1879	1879	1880	1879	1879	1879		1876	1876	1876	1876	1876	1876	1876	1876		1878	1879	1877	1879	1879	1879	1879	1879
			10.12	2083	2083	2083	2083	2084	2083	2083		2084	2084	2084	2085	2084	2084	2084		2081	2081	2081	2081	2081	2081	2081	2081		2083	2084	2082	2084	2084	2084	2084	2084
			10.13									2295	2295	2295	2296	2295	2295	2295		2292	2292	2292	2292	2292	2292	2292	2292		2294	2295	2293	2295	2295	2295	2295	2295
			10.14	2341	2341	2341	2341	2342	2341	2341		2338	2338	2338	2339	2338	2338	2338		2335	2335	2335	2335	2335	2335	2335	2335		2337	2338	2336	2338	2338	2338	2338	2338
			10.15				2526
			10.16	2578	2578	2578	2578	2579	2578	2578		2579	2579	2579	2580	2579	2579	2579		2576	2576	2576	2576	2576	2576	2576	2576		2578	2579	2577	2579	2579	2579	2580	2579
			10.17	2722	2722	2722	2722	2723	2722	2722		2723	2723	2723	2724	2723	2723	2723		2720	2720	2720	2720	2720	2720	2720	2720		2722	2723	2721	2723	2723	2723	2724	2723
			10.18	2869	2869	2869	2869	2870	2869	2869		2870	2870	2870	2871	2870	2870	2870		2869	2869	2869	2869	2869	2869	2869	2869		2869	2870	2868	2870	2870	2870	2871	2870
4	BfaII, MaeI, RmaI	C/TAG	15.1	687	687	687	687	687	687	687		685	685	685	686	685	685	685		685	685	685	685	685	685	685	685		685	685	684	686	686	686	685	686
			15.2									874	874	874	875	874	874	874		874	874	874	874	874	874	874	874		874	874	873	875	875	875	874	875
			15.3	1670	1670	1670	1670	1669	1670	1670		1669	1669	1669	1670	1669	1669	1669		1667	1667	1667	1667	1667	1667	1667	1667		1669	1670	1668	1670	1670	1670	1670	1670
			15.4																	2336	2336	2336	2336	2336	2336	2336	2336		2338	2339	2337	2339	2339	2339	2339	2339
			15.5	2652	2652	2652	2652	2653	2652	2652		2653	2653	2653	2654	2653	2653	2653		2650	2650	2650	2650	2650	2650	2650	2650		2652	2653	2651	2653	2653	2653	2654	2653
5	BstU1, FbuDII, MvnI, ThaI	CG/CG	18.1	314	314	314	314		314	314
			18.2	316	316	316	316		316	316
			18.3	1121	1121	1121	1121	1121	1121	1121		1119	1119	1119	1120	1119	1119	1119		1119	1119	1119	1119	1119	1119	1119	1119		1119	1119	1119	1119	1119	1119	1119	1119
			18.4		1730				1730	1730
			18.5										1870	1870	1870	1870		1870
			18.6	2045	2045	2045	2045	2045	2045	2045		2046	2046	2046	2046	2046	2046	2046		2043	2043	2043	2043	2043	2043	2043	2043		2045	2045	2045	2045	2045	2045	2045	2045
			18.7	2362	2362	2362	2362	2362	2362	2362		2363	2363	2363	2363	2363	2363	2363		2360	2360	2360	2360	2360	2360	2360	2360		2362	2362	2362	2362	2362	2362	2362	2362
			18.8	2573	2573	2573	2573	2573	2573	2573		2574	2574	2574	2574	2574	2574	2574		2571	2571	2571	2571	2571	2571	2571	2571		2573	2573	2573	2573	2573	2573	2573	2573
6	CfoI, HhaI	GCG/C	19.1									77	77	77	77	77	77	77
			19.2	315	315	315	315		315	315
			19.2	317	317	317	317		317	317
			19.2	836	836	836	836	836	836	836		834	834	834	835	834	834	834		834	834	834	834	834	834	834	834		834	834	833	835	835	835	835	834
			19.2	1122	1122	1122	1122	1122	1122	1122		1120	1120	1120	1121	1120	1120	1120		1120	1120	1120	1120	1120	1120	1120	1120		1120	1120	1119	1121	1121	1121	1120	1121
			19.2	1645	1645	1645	1645	1644	1645	1645		1644	1644	1644	1645	1644	1644	1644		1642	1642	1642	1642	1642	1642	1642	1642		1644	1645	1643	1645	1645	1645	1645	1645
			19.2	1869	1869	1869	1869		1869	1869
			19.2	2363	2363	2363	2363	2364	2363	2363		2364	2364	2364	2365	2364	2364	2364		2361	2361	2361	2361	2361	2361	2361	2361		2363	2364	2362	2364	2364	2364	2364	2364
			19.2	2627	2627	2627	2627	2628	2627	2627		2628	2628	2628	2629	2628	2628	2628		2625	2625	2625	2625	2625	2625	2625	2625		2627	2628	2626	2628	2628	2628	2629	2628
			19.1	2854	2854	2854	2854	2855	2854	2854		2855	2855	2855	2856	2855	2855	2855		2852	2852	2852	2852	2852	2852	2852	2852
7	HaeIII	GG/CC	24.1	785	785	785	785	785	785	785		783	783	783	783	783	783	783		783	783	783	783	783	783	783	783		783	783	782	784	784	784	783	784
			24.2									881	881	881	881	881	881	881
			24.3	1042	1042	1042	1042	1042	1042	1042		1040	1040	1040	1040	1040	1040	1040
			24.4	1116	1116	1116	1116	1116	1116	1116		1114	1114	1114	1114	1114	1114	1114		1114	1114	1114	1114	1114	1114	1114	1114		1114	1114	1113	1115	1115	1115	1114	1115
			24.5																										1216	1216	1215	1217	1217	1217	1216	1217
			24.6	1361	1361	1361	1361	1360	1361	1361		1358	1358	1358	1358	1358	1358	1358		1358	1358	1358	1358	1358	1358	1358	1358		1358	1358	1357	1359	1359	1359	1358	1359
			24.7	1445	1445	1445	1445	1444	1445	1445		1442	1442	1442	1442	1442	1442	1442
			24.8	1907	1907	1907	1907	1908	1907	1907		1908	1908	1908	1908	1908	1908	1908		1905	1905	1905	1905	1905	1905	1905	1905		1907	1908	1906	1908	1908	1908	1908	1908
			24.9	1984	1984	1984	1984	1985	1984	1984		1985	1985	1985	1985	1985	1985	1985		1982	1982	1982	1982	1982	1982	1982	1982		1984	1985	1983	1985	1985	1985	1985	1985
			24.1									2206	2206	2206	2206	2206	2206	2206		2203	2203	2203	2203	2203	2203	2203	2203		2205	2206	2204	2206	2206	2206	2206	2206
			24.11	2415	2415	2415	2415	2416	2415	2415		2416	2416	2416	2416	2416	2416	2416		2413	2413	2413	2413	2413	2413	2413	2413		2415	2416	2414	2416	2416	2416	2416	2416
			24.12	2839	2839	2839	2839	2840	2839	2839		2840	2840	2840	2840	2840	2840	2840		2837	2837	2837	2837	2837	2837	2837	2837
8	NlaIII	CATG/	36.1	356	356	356		356	356	356
			36.2	543
			36.3	695	695	695	695	695	695	695		693	693	693	694	693	693	693		693	693	693	693	693	693	693	693		693	693	692	694	694	694	693	694
			36.4	1016	1016	1016	1016	1016	1016	1016		1014	1014	1014	1015	1014	1014	1014		1014	1014	1014	1014	1014	1014	1014	1014
			36.5	1149	1149	1149	1149	1149	1149	1149		1147	1147	1147	1148	1147	1147	1147		1147	1147	1147	1147	1147	1147	1147	1147
			36.6		1232	1232	1232	1232	1232	1232		1229	1229	1229	1230	1229	1229	1229		1229	1229				1229		1229
			36.7																	1472	1472	1472	1472	1472	1472	1472	1472		1472	1472	1471	1473	1473	1473	1472	1473
			36.8									1736	1736	1736	1737	1736	1736	1736
			36.9	2156	2156	2156	2156	2156	2156	2156		2157	2157	2157	2158	2157	2157	2157
			36.1	2702	2702	2702	2702	2702	2702	2702		2703	2703	2703	2704	2703	2703	2703		2700	2700	2700	2700	2700	2700	2700	2700		2702	2703	2701	2703	2703	2703	2704	2703
9	Hin61 (HinP/L1)	G/CGC	25.1									75	75	75	75	75	75	75
			25.2	313	313	313	313		313	313
			25.3	315	315	315	315		315	315
			25.4	834	834	834	834	834	834	834		832	832	832	833	832	832	832		832	832	832	832	832	832	832	832		832	832	831	833	833	833	832	833
			25.5	1120	1120	1120	1120	1120	1120	1120		1118	1118	1118	1119	1118	1118	1118		1118	1118	1118	1118	1118	1118	1118	1118		1118	1118	1117	1119	1119	1119	1118	1119
			25.6	1643	1643	1643	1643	1642	1643	1643		1642	1642	1642	1643	1642	1642	1642		1640	1640	1640	1640	1640	1640	1640	1640		1642	1643	1641	1643	1643	1643	1643	1643
			25.7	1867	1867	1867	1867		1867	1867
			25.8	2361	2361	2361	2361	2362	2361	2361		2362	2362	2362	2363	2362	2362	2362		2359	2359	2359	2359	2359	2359	2359	2359		2361	2362	2360	2362	2362	2362	2362	2362
			25.9	2625	2625	2625	2625	2626	2625	2625		2626	2626	2626	2627	2626	2626	2626		2623	2623	2623	2623	2623	2623	2623	2623		2625	2626	2624	2626	2626	2626	2627	2626
			25.1	2852	2852	2852	2852	2853	2852	2852		2853	2853	2853	2854	2853	2853	2853		2850	2850	2850	2850	2850	2850	2850	2850
10	HpaII, MspI	C/CGG	27.1									78	78	78	78	78	78	78
			27.2	105	105	105	105	105	105	105		104	104	104	104	104	104	104		105	105	105	105	105	105	105	105		105	105	105	105	105	105	105	105
			27.3	183	183	183	183	183	183	183		182	182	182	182	182	182	182		183	183	183	183	183	183	183	183		183	183	183	183	183	183	183	183
			27.4	486	486	486	486	486	486	486		485	485	485	485	485	485	485		486	486	486	486	486	486	486	486		486	486	486	486	486	486	486	486
			27.5	679	679	679	679	679	679	679		677	677	677	678	677	677	677		677	677	677	677	677	677	677	677		677	677	676	678	678	678	677	678
			27.6	795	795	795	795	795	795	795		793	793	793	794	793	793	793		793	793	793	793	793	793	793	793		793	793	792	794	794	794	793	794
			27.7	853	853	853	853	853	853	853		851	851	851	852	851	851	851
			27.8									887	887	887	888	887	887	887
			27.9	921	921	921	921	921	921	921		919	919	919	920	919	919	919
			27.1	1297	1297	1297	1297	1296	1297	1297		1294	1294	1294	1295	1294	1294	1294		1294	1294	1294	1294	1294	1294	1294	1294		1294	1294	1293	1295	1295	1295	1294	1295
			27.11	1446	1446	1446	1446	1445	1446	1446		1443	1443	1443	1444	1443	1443	1443		1443	1443	1443	1443	1443	1443	1443	1443		1443	1443	1442	1444	1444	1444	1443	1444
			27.12	1462	1462	1462	1462	1461	1462	1462		1459	1459	1459	1460	1459	1459	1459		1459	1459	1459	1459	1459	1459	1459	1459		1459	1459	1458	1460	1460	1460	1459	1460
			27.13																	1495	1495	1495	1495	1495	1495	1495	1495		1495	1495	1494	1496	1496	1496	1495	1496
			27.14	1837	1837	1837	1837	1836	1837	1837		1836	1836	1836	1837	1836	1836	1836		1833	1833	1833	1833	1833	1833	1833	1833		1835	1836	1834	1836	1836	1836	1836	1836
			27.15	1894	1894	1894	1894	1895	1894	1894		1895	1895	1895	1896	1895	1895	1895		1892	1892	1892	1892	1892	1892	1892	1892		1894	1895	1893	1895	1895	1895	1895	1895
			27.16	2214	2214	2214	2214	2215	2214	2214		2215	2215	2215	2216	2215	2215	2215		2211	2211	2211	2211	2211	2211	2211	2211								2214
			27.17	2394	2394	2394	2394	2395	2394	2394		2395	2395	2395	2396	2395	2395	2395		2392	2392	2392	2392	2392	2392	2392	2392		2394	2395	2393	2395	2395	2395	2395	2395
			27.18	2442	2442	2442	2442	2443	2442	2442		2443	2443	2443	2444	2443	2443	2443		2440	2440	2440	2440	2440	2440	2440	2440		2442	2443	2441	2443	2443	2443	2443	2443
			27.19	2666	2666	2666	2666	2667	2666	2666		2667	2667	2667	2668	2667	2667	2667		2664	2664	2664	2664	2664	2664	2664	2664		2666	2667	2665	2667	2667	2667	2668	2667
			27.2	2716	2716	2716	2716	2717	2716	2716		2717	2717	2717	2718	2717	2717	2717		2714	2714	2714	2714	2714	2714	2714	2714		2716	2717	2715	2717	2717	2717	2718	2717
			27.21	2840	2840	2840	2840	2841	2840	2840		2841	2841	2841	2842	2841	2841	2841		2838	2838	2838	2838	2838	2838	2838	2838
			27.22	2874	2874	2874	2874	2875	2874	2874		2875	2875	2875	2876	2875	2875	2875		2872	2872	2872	2872	2872	2872	2872	2872
11	TaqI	T/CGA	46.1	139	139	139	139	139	139	139
			46.2	365	365	365	365	365	365	365		364	364	364	364	364	364	364		365	365	365	365	365	365	365	365		365	365	365	365	365	365	365	365
			46.3	1108	1108	1108	1108	1108	1108	1108		1106	1106	1106	1107	1106	1106	1106		1106	1106	1106	1106	1106	1106	1106	1106		1106	1106	1105	1107	1107	1107	1106	1107
			46.4	1344	1344	1344	1344	1343	1344	1344		1341	1341	1341	1342	1341	1341	1341		1341	1341	1341	1341	1341	1341	1341	1341		1341	1341	1340	1342	1342	1342	1341	1342
			46.5	1375	1375	1375	1375	1374	1375	1375		1372	1372	1372	1373	1372	1372	1372		1372	1372	1372	1372	1372	1372	1372	1372		1372	1372	1371	1373	1373	1373	1372	1373
			46.6	1751	1751	1751	1751	1750	1751	1751		1750	1750	1750	1751	1750	1750	1750		1747	1747	1747	1747	1747	1747	1747	1747		1749	1750	1748	1750	1750	1750	1750	1750
			46.7	1886	1886	1886	1886	1887	1886	1886		1887	1887	1887	1888	1887	1887	1887		1884	1884	1884	1884	1884	1884	1884	1884		1886	1887	1885	1887	1887	1887	1887	1887
			46.8	2479	2479	2479	2479	2480	2479	2479		2480	2480	2480	2481	2480	2480	2480		2477	2477	2477	2477	2477	2477	2477	2477		2479	2480	2478	2480	2480	2480	2480	2480
			46.9	2500	2500	2500	2500	2501	2500	2500		2501	2501	2501	2502	2501	2501	2501		2498	2498	2498	2498	2498	2498	2498	2498		2500	2501	2499	2501	2501	2501	2501	2501
31	MseI, Tru91	T/TAA	31.1	3	3	3	3	3	3	3		3	3	3	3	3	3	3		3	3	3	3	3	3	3	3		3	3	3	3	3	3	3	3
			31.2	153	153	153	153	153	153	153										153	153	153	153	153	153	153	153		153	153	153	153	153	153	153	153
			31.3	170	170	170	170	170	170	170										170	170	170	170	170	170	170	170		170	170	170	170	170	170	170	170
			31.4	606	606	606	606	606	606	606		604	604	604	605	604	604	604		604	604	604	604	604	604	604	604		604	604	603	605	605	605	604	605
			31.5	641	641	641	641	641	641	641		639	639	639	640	639	639	639		639	639	639	639	639	639	639	639		639	639	638	640	640	640	639	640
			31.6	652	652	652	652	652	652	652		650	650	650	651	650	650	650		650	650	650	650	650	650	650	650		650	650	649	651	651	651	650	651
			31.7	1018	1018	1018	1018	1018	1018	1018		1016	1016	1016	1017	1016	1016	1016		1016	1016	1016	1016	1016	1016	1016	1016		1016	1016	1015	1017	1017	1017	1016	1017
			31.8	1082	1082	1082	1082	1082	1082	1082		1080	1080	1080	1081	1080	1080	1080		1080	1080	1080	1080	1080	1080	1080	1080		1080	1080	1079	1081	1081	1081	1080	1081
			31.9	1325	1325	1325	1325	1325	1325	1325		1322	1322	1322	1323	1322	1322	1322		1322	1322	1322	1322	1322	1322	1322	1322		1322	1322	1321	1323	1323	1323	1322	1323
			31.1	1390	1390	1390	1390	1390	1390	1390		1387	1387	1387	1388	1387	1387	1387		1387	1387	1387	1387	1387	1387	1387	1387		1387	1387	1387	1388	1388	1388	1387	1388
			31.11	1467	1467	1467	1467	1467	1467	1467		1464	1464	1464	1465	1464	1464	1464		1464	1464	1464	1464	1464	1464	1464	1464		1464	1464	1463	1465	1465	1465	1464	1465
			31.12									1505	1505	1505	1506	1505	1505	1505											1505	1506	1504	1506	1506	1506	1506	1506
			31.13																			1591	1591	1591		1591				1594
			31.14	1781	1781	1781	1781	1781	1781	1781		1780	1780	1780	1781	1780	1780	1780		1777	1777	1777	1777	1777	1777	1777	1777		1779	1780	1778	1780	1780	1780	1780	1780
			31.15	1851	1851	1851	1851	1851	1851	1851		1850	1850	1850	1850	1850	1850	1850		1847	1847	1847	1847	1847	1847	1847	1847		1849	1850	1848	1850	1850	1850	1850	1850
			31.16	2181	2181	2181	2181	2181	2181	2181		2182	2182	2182	2183	2182	2182	2182		2179	2179	2179	2179	2179	2179	2179	2179		2181	2182	2190	2182	2182	2182	2182	2182
			31.17	2562	2562	2562	2562	2562	2562	2562		2563	2563	2563	2564	2563	2563	2563		2560	2560	2560	2560	2560	2560	2560	2560		2562	2563	2561	2563	2563	2563	2564	2563
			31.18		2797	2797			2797											2795	2795	2795	2795			2795	2795		2797	2798	2796	2798	2798	2798	2799	2798
			31.19																	2815		2815	2815	2815	2815	2815	2815		2817	2818	2816	2818	2818	2818	2819	2818
			31.2	2897	2897	2897	2897	2897	2897	2897		2898	2898	2898	2899	2898	2898	2898		2895	2895	2895	2895	2895	2895	2895	2895		2897	2898	2896	2898	2898	2898	2899	2898
39	RsaI	GT/AC	39.1	18	18	18	18	18	18	18		18	18	18	18	18	18	18		18	18	18	18	18	18	18	18		18	18	18	18	18	18	18	18
			39.2	206	206	206	206	206	206	206		205	205	205	205	205	205	205		206	206	206	206	206	206	206	206		206	206	206	206	206	206	206	206
			39.3									320	320	320	320	320	320	320		321	321	321	321	321	321	321	321		321	321	321	321	321	321	321	321
			39.4	339	339	339	339	339	339	339		338	338	338	338	338	338	338		339	339	339	339	339	339	339	339		339	339	339	339	339	339	339	339
			39.5	459	459	459	459	459	459	459		458	458	458	458	458	458	458		459	459	459	459	459	459	459	459		459	459	459	459	459	459	459	459
			39.6	521	521	521	521	521	521	521		520	520	520	520	520	520	520		521	521	521	521	521	521	521	521		521	521	521	521	521	521	521	521
			39.7	562	562	562	562	562	562	562		560	560	560	561	560	560	560		560	560	560	560	560	560	560	560		560	560	559	561	561	561	560	561
			39.8	1219
			39.9	1402	1402	1402	1402	1402	1402	1402		1399	1399	1399	1400	1399	1399	1399		1399	1399	1399	1399	1399	1399	1399	1399		1399	1399	1398	1400	1400	1400	1399	1400
			39.1																										1499	1499	1498	1500	1500	1500	1499	1500
			39.11	1602	1602	1602	1602	1602	1602	1602		1601	1601	1601	1602	1601	1601	1601		1599	1599	1599	1599	1599	1599	1599	1599		1601	1602	1600	1602	1602	1602	1602	1602
			39.12	2041	2041	2041	2041	2041	2041	2041		2042	2042	2042	2043	2042	2042	2042		2039	2039	2039	2039	2039	2039	2039	2039		2041	2042	2040	2042	2042	2042	2042	2042
			39.13	2438	2438	2438	2438	2438	2438	2438		2439	2439	2439	2440	2439	2439	2439		2436	2436	2436	2436	2436	2436	2436	2436		2438	2439	2437	2439	2439	2439	2439	2439
			39.14	2571	2571	2571	2571	2571	2571	2571		2572	2572	2572	2573	2572	2572	2572		2569	2569	2569	2569	2569	2569	2569	2569		2571	2572	2570	2572	2572	2572	2573	2572
			39.15	2656	2656	2656	2656	2656	2656	2656		2657	2657	2657	2658	2657	2657	2657		2654	2654	2654	2654	2654	2654	2654	2654		2656	2657	2655	2657	2657	2657	2658	2657
			39.16	2878	2878	2878	2878	2878	2878	2878		2879	2879	2879	2880	2879	2879	2879		2876	2876	2876	2876	2876	2876	2876	2876
45	TasI, TspE1, Tsp5091	/AATT	45.1																	135	134	748	268	135	135	135	135		134	134	135	135	135	750	135	135
			45.2	751	751	751	751	751	887	887		749	749	748	748	748	748	748		749	748	840	888	749	749	749	749		748	748	748	750	750	842	749	750
			45.3		843	843	843	843												841									840		840	842	842		841	842
			45.4						964	964
			45.5						1048	1048
			45.6	1852	1852	1851	1852	1852				1851	1851	1850	1850	1850	1850	1850		1848	1847	1847	965	1848	1848	1848	1848		1849	1850	1849	1851	1851	1851	1851	1851
			45.7	1936	1936	1937	1936	1936	2057	2057		1937	1937	1936	1936	1936	1936	1936		1934	1933	1933	1051	1934	1934	1934	1934		1935	1936	1935	1937	1937	1937	1937	1937
			45.8	2013	2013	2014	2013	2013	2149	2149		2014	2014	2013	2013	2013	2013	2013		2011	2010	2010	2150	2011	2011	2011	2011		2012	2013	2012	2014	2014	2014	2014	2014
			45.9																	2631	2630	2630	2764	2903	2903	2631	2631		2632	2633	2632	2634	2634	2634	2635	2634

## Sheet: A.5
Supplementary A5
Biochemical Characterization of Isolated samples
	B					M			B					M			B					M
	EMB	I	M	V	C	P1	P2		EMB	I	M	V	C	P1	P2		EMB	I	M	V	C	P1	P2
C1	G	+	+	-	-	E	I	F1	Pi*	-	-	-	-	NE	X	E1	G	+	-	-	-	E	I
C2	G	+	+	-	-	E	I	F2	Pi	-	-	-	+	NE	X	E2	G	+	+	-	-	E	I
C3	PI*	-	-	+	+	E	I	F3	G	-	-	-	+	E	III	E3	G	+	-	-	+	E	I
C4	PI*	-	-	+	+	E	I	F4	P**	+	+	-	-	E	I	E4	G	+	-	-	+	E	I
C5	Pi	+	-	-	-	E	I	F5	Pi**	-	+	-	-	NE	X	E5	G	+	-	+	+	E	I
C6	PI*	+	-	-	-	NE	X	F6	G	+	+	-	-	E	I	E6	G	+	+	-	-	E	I
C7	G	+	+	-	-	E	I	F7	G	+	+	-	-	E	I	E7	G	+	-	-	+	E	I
C8	Pi	-	-	-	-	NE	X	F8	G	+	+	-	-	E	I	E8	G	+	-	-	-	E	I
C9	P	-	-	-	-	NE	X	F9	G	+	+	-	-	E	I	E9	G	+	-	-	-	E	I
C10	G	+	+	-	-	E	I	F10	Pi	-	-	+	-	E	I	E10	G	+	-	+	+	E	I
C11	G	+	+	-	-	E	I	F11	G	+	+	-	-	E	I	E11	G	+	-	-	+	E	I
C12	Pi*	+	+	-	-	E	I	F12	G	+	+	-	-	E	I	E12	G	+	-	-	+	E	I
C13	P	-	-	-	-	NE		F13	G	-	-	-	-	E	I	E13	Pi	-	-	-	+	E	I
C14	G	+	+	-	-	E	I	F14	G	+	+	-	-	E	I	E14	G	+	+	-	-	E	I
C15	G	+	+	-	-	E	III	F15	P**	+	+	-	-	E	I	E15	Pi	+	+	-	-	E	I
C16	Pi	+	+	-	-	E	I	F16	G	+	+	-	-	E	I	E16	G	+	+	-	-	E	I
C17	P**	+	+	-	-	E	I	F17	Pi	+	-	+	-	E	I	E17	P	-	+	-	+	E	I
C18	Pi	-	+	-	-	E	I	F18	P**	+	+	-	-	E	I	E18	P	-	-	-	+	E	I
C19	G	-	-	+	+	E	I	F19	G	+	+	-	-	E	I	E19	G	+	+	-	-	E	I
C20	G	-	+	-	+	E	I	F20	G	+	+	-	-	E	I	E20	P	-	-	+	+	E	I
C21	G	+	+	-	-	NE	X	F21	G	+	+	-	-	E	I	E21	P	-	-	-	+	E	I
C22	Pi	+	+	-	-	E	I	F22	G	+	+	-	-	E	I	E22	G	+	+	-	-	E	I
C23	G	-	-	+	-	E	III	F23	G	-	+	-	-	E	I	E23	G	+	+	-	-	E	I
C24	Pi	-	-	-	-	NE	X	F24	G	+	+	-	-	E	I	E24	P	-	-	+	+	E	I
C25	Pi	+	+	-	-	NE	X	F25	Pi***	+	+	-	-	E	I	E25	P	-	-	+	-	E	I
Biochemical Vs Molecular Characterization of Isolated samples
Assays										Categories							C		F		E
(+) Biochemical (+) Molecular										Positives							11 (44%)		17(68%)		8(32%)
(-) Biochemical (-) Molecular										Negatives							5		3			0
(+) Biochemical (-) Molecular										False Negatives							2		0			0
(-) Biochemical (+) Molecular										False Positives							7 (28%)		5(20%)			17(68%)
B: Biochemical analysis ; M: Molecular assay; Indole test (I); Methyl red (M) Vogues Prasaueker (V); Citrate test (C); Clinical samples (C ); Commensal/Fecal isolates (F); Environmental isolates (E); Green colonies (G); Pink colonies (Pi); Pink colonies with purple core (Pi*); Purple (P);P** (Purple colonies with green sheen halo; presence (+);absence (-): P1 for 23S P1 880 with BfaI digest and P…

## Sheet: A.6
Supplementary data A6
Divergence/Variations in rrsH (16S rrn) & rrlH (23S rrn) of candidate and non-candidate strains(reference strains)
Features	16S ( Av 1545bp)					23S (Av 2904bp)
	C		E	Ea	K	C	E	Ea	K
Size	1547		1542	1554	1540	2907	2904	2905	2902
Mismatches	72 mismatch (4.6%)					159 mismatch (5.47%)
Type	49 Transitions					90 Transitions
	20 Transversions					57 Transversions
	3 gaps					11 gaps
Mismatch with E.coli	38	-		53	46	89	-	108	86
Gap introduced	5E	-		12E	2K	4C/7E	-	5Ea/6E	2K/2E
E: E.coli ;C:C.koseri; Ea:E.aerogenes; K:K.pneumoniae. Sequence data and location details of small and large rrn clusters of E.coli str K12 MG 1655 (NC_000913.2), C.koseri ATCC BAA-895 (NC_009792.1), E.aerogenes (NC_015663.1) and K.pneumoniae subsp pneumoniae MGH 78578 (NC_009648.1) were collated together by perl stretch program (self designed) from the fasta format obtained from Genbank(NCBI). T…

## Sheet: A.7
Supplementary data A7
Gene size, Intra-genic variations in Regular and Complementary strands of E coli Genomes
Strains	Nature	Genesize	R	C	RD	% RD	CD	%CD
MG1655	COM	2904	5	2	31	0.0106749	12	0.00413223
W3110	COM	2903	2	5	14	0.0048226	24	0.00826731
DH10B	COM	2904	5	2	31	0.0106749	9	0.00309917
DH1	COM	2901	2	5	13	0.00448121	34	0.0117201
DH1ME	COM	2901	2	5	34	0.0117201	13	0.00448121
BW2952	COM	2903	5	2	30	0.0103341	9	0.00310024
P12B	COM	2903	5	2	20	0.00688942	1743	0.600413
ATCC8739	COM	2979	2	5	18	0.0060423	28	0.00939913
W	COM	2901	5	2	27	0.00930714	7	0.00241296
W(2)	COM	2905	5	2	10	0.00344234	1	0.000344234
KO11FL	COM	2901	2	5	8	0.00275767	18	0.00620476
KO11FL(2)	COM	2904	5	2	23	0.00792011	10	0.00344353
REL606	COM	2905	5	2	37	0.0127367	19	0.00654045
GOLD	COM	2903	2	5	19	0.00654495	98	0.0337582
BL21DE3(1)	COM	2905	5	2	39	0.0134251	19	0.00654045
BL21DE3(2)	COM	2905	5	2	51	0.0175559	19	0.00654045
IAI	COM	2903	5	2	12	0.00413365	0	0
HS	COM	2903	5	2	20	0.00688942	4	0.00137788
SE11	COM	2903	5	2	11	0.00378918	11	0.00378918
SE15	COM	2903	5	2	2	0.000688942	0	0
ED1A	COM	2903	5	2	0	0	0	0
NRG857C	EIEC	2905	5	2	31	0.0106713	27	0.00929432
LF82	EIEC	2903	5	2	20	0.00688942	27	0.00930072
UM146	EIEC	2905	3	4	0	0	2	0.000688468
1136S	EHEC	2905	3	4	14	0.00481928	13	0.00447504
12009	EHEC	2905	3	4	4	0.00137694	15	0.00516351
11128	EHEC	2903	5	2	15	0.00516707	13	0.00447813
E2438/69	EPEC	2903	5	2	6	0.00206683	1740	0.59938
CB9615	EPEC	2902	5	2	4	0.00137836	4	0.00137836
RM12598	EPEC	2904	5	2	15	0.00516529	1	0.000344353
EDL933	EPEC	2904	5	2	39	0.0134298	22	0.00757576
EC4115	EPEC	2904	5	2	5	0.00172176	12	0.00413223
SAKAI	EPEC	2904	5	2	19	0.0065427	4	0.00137741
TW14359	EPEC	2904	5	2	6	0.00206612	5	0.00172176
XUZH0421	EPEC	2904	5	2	19	0.0065427	4	0.00137741
ABU	UPEC	2903	5	2	37	0.0127454	21	0.0072339
NA114	UPEC	2907	4	3	7	0.00240798	0	0
536	UPEC	2903	5	2	32	0.0110231	3	0.00103341
UTI89	UPEC	2903	5	2	9	0.00310024	3	0.00103341
CFT073	UPEC	2903	5	2	52	0.0179125	16	0.00551154
IAI39	UPEC	2903	2	5	0	0	2	0.000688942
CLONEDI2	UPEC	2903	5	2	6	0.00206683	3	0.00103341
CLONEDI3	UPEC	2903	5	2	5	0.00172236	3	0.00103341
S88	EXPEC	2903	5	2	1	0.000344471	3	0.00103341
IHE3034	EXPEC	2903	5	2	9	0.00310024	0	0
CE10	EXPEC	2903	5	2	2	0.000688942	2	0.000688942
UMN026	EXPEC	2904	5	2	26	0.00895317	4	0.00137741
APEC01	APEC	2905	5	2	88	0.0302926	15	0.00516351
042	EAEC	2905	5	2	46	0.0158348	42	0.0144578
55989	EAEC	2903	5	2	14	0.0048226	6	0.00206683
2009EL-2050	EAEC	2905	2	5	9	0.00309811	28	0.00963855
2009EL-2071	EAEC	2905	2	5	10	0.00344234	10	0.00344234
2011-3403	EAEC	2905	2	5	10	0.00344234	15	0.00516351
ETECH10407	ETEC	2903	5	2	4	0.00137788	1757	0.605236
E24377A	ETEC	2923	5	2	6	0.00205269	23	0.00786863
UMNK88	ETEC	2903	5	2	32	0.0110231	5	0.00172236
SMS-3-5	ENV	2904	5	2	23	0.00792011	7	0.00241047
Grey shade represents that common gene size of the segments among the seven repeats in each genome; Regular strands (R ); Complementary strand(C ); Diversity in complementary strand (CD); Diversity in Regular strand (RD). Diversity is estimated by counting the number of mismatches that includes transitions,transversions and gaps.

## Sheet: A.8
Supplementary data A8
Blast Genome Table analysis of 23S P1880 across bacterial families
S	Phylum/family	GD	CGD	Remarks
1	Actinobacteria	245	120	No binding
2	Bacteroidetes/Chlorobi	180	64	No binding
3	Chlamydiae	13	10	No annealing sites for RP; unspecific FP binding
4	Cyanobacteria	56	28	No binding
5	Firmicutes			No binding
a	Bacillales	96	50	No annealing sites for RP; unspecific FP binding
b	Clostridia	187	80	No annealing sites for RP unspecific FP binding
c	Lactobacillales	134	53	No binding
d	Others	46	6	No binding
e	Mollicutes	37	28	No binding
6	Others	139	87	No binding
7	Proteobacteria
a	others	2	1	No binding
b	alpha division	177	86	Unspecific bindings at 5’ end of FP and 3’ end of RP
i	others	-	-
ii	Rhizobiaceae	11	10	Unspecific bindings ; BfaI sites 2-3
iii	Rickettsiales	38	27	Unspecific bindings ; BfaI sites 4-5
c	beta- subdivision
i	Bordetella	6	5	No binding
ii	Burkholderiaceae	36	23	2-3 mispriming sites in both FP/RP; no RS for BfaI
iii	Neisseriaceae	187	80	few unspecific binding; BfaI sites in the range of 2-4
d	others	134	53	unspecific binding at 3’ ends; BfaI sites more than 1
e	delta division	46	6	No binding
f	epsilon division	37	28	No binding
g	gamma division
i	Enterobacteriales	139	87	Showed completed annealing
ii	others	2	1	Unspecific binding; BfaI sites 2-6
iii	Pasteurellaceae	22	12	few unspecific binding; BfaI sites in the range of 2-4
iv	Vibrionaceae	39	10	Unspecific bindings ; BfaI sites 3-4
v	Xanthomonadaceae	19	10	No annealing sites for RP; unspecific FP binding
vi	Pseudomonadaceae	20	7	No binding
vi	Spirochaetales	39	30	No binding
S: Serial No; GC: genome data available for each family; CGD: complete annoatated genome data taken;FP/RP: Forward/Reverse primer

## Sheet: A.9
SUPPLEMENTARY DATA - A9
Location , amplicons and ARDRA sites with Hae III of 23SP2 682 primers in Escherichia coli genomes
S. No	Genome	location of rrn operon	rrn operon	size of rrn operon	location of 23S P2 in genome	size of 23S P2 amplicon	Hae III cuts	Positions
NON-PATHOGENIC STRAIN
1	E.coli str. K-12 substr. MG1655	225759 --- 228662	H	2903	227715 --- 228397	682	2	28, 459
	NC_000913.2	C 2724303 --- 2727206	G	2903	C 2725249---2724567	682	2	28, 459
	U00096.2	C 3421902 --- 3424805	D	2903	C 3422848---3422166	682	2	28, 459
	4639675 bp (4.64)	3941727 --- 3944630	C	2903	3943683 --- 3944365	682	2	28, 459
	50.8	4035542 --- 4038446	A	2904	4037499 --- 4038181	682	2	28, 459
		4166664 --- 4169567	B	2903	4168620 --- 4169302	682	2	28, 459
		4208066 --- 4210969	E	2903	4210022 --- 4210704	682	2	28, 459
2	E.coli str. K-12 substr. W3110	225759 --- 228662	H	2903	227715 --- 228397	682	2	28, 459
	AC_000091	C 2724937 --- 2727840	G	2903	C 2725883---2725201	682	2	28, 459
	AP009048.1	C 3423735 --- 3426638	D	2903	C 3424681---3423999	682	2	28, 459
	4646332 bp (4.65)	C 3465137 --- 3468040	B	2903	C 3466083---3465401	682	2	28, 459
	50.8	C 3596258 --- 3599162	A	2904	C 3597204---3596522	682	2	28459
		C 3690074 --- 3692977	C	2903	C 3691020---3690338	682	2	28, 459
		4213633 --- 4216536	E	2903	4215589 --- 4216271	682	2	28459
3	E.coli str. K-12 substr. DH10B	199863 --- 202766	H	2903	201819 --- 202501	682	2	28, 459
	NC_010473.1	C 2816068 --- 2818971	G	2903	C 2817014---2816332	682	2	28, 459
	CP000948.1	C 3519647 --- 3522550	D	2903	C 3520593---3519911	682	2	28, 459
	4686137 bp (4.69)	4040647 --- 4043550	C	2903	4042603 --- 4043285	682	2	28, 459
	50.8	4134462 --- 4137366	A	2904	4136419 --- 4137101	682	2	28459
		4266361 --- 4269264	B	2903	4268317 --- 4268999	682	2	28, 459
		4307762 --- 4310665	E	2903	4309718 --- 4310400	682	2	28459
4	E.coli DH1	456983 --- 459884	ECDH1_R006	2901	458937 --- 459619	682	2	28, 459
	CP001637.1	1154580 --- 1157481	ECDH1_R0029	2901	1156534 --- 1157216	682	2	28, 459
	4630707 bp (4.63)	C 3642716 --- 3645617	ECDH1_R0075	2901	C 3643662---3642980	682	2	28, 459
	50.8	C 4301524 --- 4304425	ECDH1_R0088	2901	C 4302470---4301788	682	2	28, 459
		C 4342926 --- 4345827	ECDH1_R0096	2902	C 4343872---4343190	682	2	28459
		C 4474047 --- 4476949	ECDH1_R0111	2901	C 4474993---4474311	682	2	28, 459
		C 4567863 --- 4570764	ECDH1_R0101	2901	C 4568809---4568127	682	2	28459
5	E.coli DH1 (ME8569)	225762 --- 228663	H	2901	227716 --- 228398	682	2	28, 459
	AP012030.1	C 2704190 --- 2707091	G	2901	C 2705136---2704454	682	2	28, 459
	4621430 bp (4.62)	C 3401786 --- 3404687	D	2901	C 3402732---3402050	682	2	28, 459
	50.8	3922811 --- 3925712	C	2901	3924765 --- 3925447	682	2	28, 459
		4016626 --- 4019528	A	2902	4018581 --- 4019263	682	2	28459
		4147748 --- 4150649	B	2901	4149702 --- 4150384	682	2	28, 459
		4189150 --- 4192051	E	2901	4191104 --- 4191786	682	2	28459
6	E.coli BW2952	225758 --- 228661	H	2903	227714 --- 228396	682	2	28, 459
	NC_012759.1	C 2610108 --- 2613011	G	2903	C 2611054---2610372	682	2	28, 459
	CP001396.1	C 3309050 --- 3311953	D	2903	C 3309996---3309314	682	2	28, 459
	4578159 bp (4.58)	3831396 --- 3834299	C	2903	3833352 --- 3834034	682	2	28, 459
	50.8	3925211 --- 3928115	A	2904	3927168 --- 3927850	682	2	28459
		4056344 --- 4059247	B	2903	4058300 --- 4058982	682	2	28, 459
		4097746 --- 4100649	E	2903	4099702 --- 4100384	682	2	28459
7	E.coli P12b	219667---222571	P12B_r0002	2904	221624---222306	682	2	28459
	NC_017663.1	C 2939515---2942418	P12B_r0005	2903	C 2939780---2940462	682	2	28459
	CP002291.1	C 369025---3693160	P12B_r0009	2907	C 3690518---3691200	682	3.5	28249459
	4935294 bp (4.9)	4253093---4255996	P12B_r0012	2903	4255050---4255732	682	2	28459
	50.9	4345100---4348004	P12B_r0015	2904	4347057---4347740	682	2	28459
		4479087---4481990	P12B_r0018	2903	4481044---4481726	682	2	28459
		4520386---4523289	P12B_r0021	2903	4522343---4523025	682	2	28459
8	E.coli ATCC 8739	468076 --- 471061	EcolC_R008	2985	470114 --- 470796	682	2	28, 459
	NC_010468.1	1183661 --- 1186643	EcolC_R0033	2982	1185696 --- 1186378	682	2	28, 459
	CP000946.1	C 3771158 --- 3774137	EcolC_R0088	2979	C 3772104---3771422	682	2	28, 459
	4746218 bp (4.75)	C 4420328 --- 4423307	EcolC_R0103	2979	C 4421274---4420592	682	2	28, 459
	50.9	C 4460617 --- 4463596	EcolC_R0111	2979	C 4461563---4460881	682	2	28459
		C 4591433 --- 4594417	EcolC_R0117	2984	C 4592379---4591697	682	2	28, 459
		C 4683379 --- 4686361	EcolC_R0128	2982	C 4684325---4683643	682	2	28459
9	E.coli W	226233 --- 229134	H	2901	228187 --- 228869	682	3	28, 207, 459
	CP002185.1	C 2897203 --- 2900104	G	2901	C 2898149---2897467	682	2	28, 459
	4900968 (4.9)	C 3636841 --- 3639742	D	2901	C 3637787---3637105	682	3	28, 207, 459
	50.7	4168138 --- 4171039	C	2901	NONE---4170092	682	2	28, 459
		4261861 --- 4264761	A	2900	4263814 --- 4264496	682	2	28, 459
		4433291 --- 4436191	B	2900	4435244 --- 4435926	682	3	28, 207, 459
		4473749 --- 4476650	E	2901	4475703 --- 4476385	682	2	28, 459
10	E.coli W	226231---229136	H	2905	228187---228869	682	2	28459
	NC_017664	C 2893778---2896683	G	2905	C 2894044---2894726	682	2	28459
	CP002970.1	C 3633332---3636237	D	2905	C 3633598---3634280	682	2	28459
	4897452 bp (4.9)	4164616---4167521	C	2905	4166572---4167254	682	2	28459
	50.8	4258339---4261244	A	2905	4260295---4260977	682	2	28459
		4429770---4432675	B	2905	4431726---4432408	682	2	28459
		4470230---4473135	E	2905	4472186---4472868	682	2	28459
11	E.coli KO11FL	466331 --- 469232	EKOH_R006	2901	468285 --- 468967	682	3	28, 207, 459
	CP002516.1	1205753 --- 1208653	EKOH_R0026	2900	1207706 --- 1208388	682	2	28, 459
	4920168 bp (4.92)	C 3882769 --- 3885670	EKOH_R0074	2901	C 3883715---3883033	682	2	28, 459
	50.8	C 4549592 --- 4552493	EKOH_R0087	2901	C 4550538---4549856	682	2	28, 459
		C 4590053 --- 4592953	EKOH_R0095	2900	C 4590999---4590317	682	2	28, 459
		C 4761482 --- 4764383	EKOH_R0099	2901	C 4762428---4761746	682	2	28, 459
		C 4855204 --- 4858104	EKOH_R0110	2900	C 4856150--- NONE	682	2	28, 459
12	E.coli KO11FL	226231---229136	H	2905	228187---228869	682	2	28249
	NC_017660.1	C 502090---504994	E	2904	C 502355---503037	682	3	28207459
	CP002970.1	C 542550---545454	B	2904	C 542816---543498	682	2	28459
	5021812 bp (5)	813397---816302	C	2905	815353---NONE	682	2	28459
	50.8	908458---911362	A	2904	910413---911095	682	2	28459
		1349689---1352593	D	2904	1351644---1352326	682	3	28207459
		2094585---2097490		2904	2096541---2097223	682	2	28249
13	E.coli B str. REL606	228588 --- 231493	H	2905	230546 --- 231228	682	4	28, 207, 249, 459
	NC_012967.1	C 2647772 --- 2650677	G	2905	C 2648718---2648036	682	4	28, 207, 249, 459
	CP000819.1	C 3351772 --- 3354679	D	2907	C 3352718---3352036	682	4	28, 207, 249, 459
	4629812 bp (4.63)	3905502 --- 3908407	C	2905	3907460 --- 3908142	682	4	28, 207, 249, 459
	50.8	4015892 --- 4018795	A	2903	4017848 --- 4018530	682	2	28, 459
		4148416 --- 4151323	B	2907	4150376 --- 4151058	682	4	28, 207, 249, 459
		4189621 --- 4192526	E	2905	4191579 --- 4192261	682	4	28, 207, 249, 459
14	E.coli 'BL21-Gold(DE3)pLysS AG'	485862 --- 488767	ECBD_R006	2905	487820 --- 488502	682	4	28, 207, 249, 459
	NC_012947.1	1144122 --- 1147025	ECBD_R0028	2903	1146078 --- 1146760	682	4	28, 207, 249, 459
	CP001665.1	C 3550888 --- 3553793	ECBD_R0074	2905	C 3551834---3551152	682	4	28, 207, 249, 459
	4570938 bp (4.57)	C 4221507 --- 4224410	ECBD_R0087	2903	C 4222453---4221771	682	4	28, 207, 249, 459
	50.8	C 4262710 --- 4265614	ECBD_R0095	2904	C 4263656---4262974	682	4	28, 207, 249, 459
		C 4396575 --- 4399476	ECBD_R0099	2901	C 4397521---4396839	682	2	28, 459
		C 4506963 --- 4509866	ECBD_R0110	2903	C 4507909---4507227	682	4	28, 207, 249, 459
15	E.coli BL21(DE3)_1	228589 --- 231494	H	2905	230549 --- 231231	682	4	28, 207, 249, 459
	CP001509.3	C 2592879 --- 2595784	G	2905	C 2593825---2593143	682	4	28, 207, 249, 459
	4558953 bp (4.56)	C 3285037 --- 3287944	D	2907	C 3285983---3285301	682	4	28, 207, 249, 459
	50.8	3833942 --- 3836847	C	2905	3835900 --- 3836582	682	4	28, 207, 249, 459
		3944332 --- 3947235	A	2903	3946288 --- 3946970	682	2	28, 459
		4076856 --- 4079763	B	2907	4078816 --- 4079498	682	4	28, 207, 249, 459
		4118061 --- 4120966	E	2905	4120019 --- 4120701	682	4	28, 207, 249, 459
16	E.coli BL21(DE3)_2	228589 --- 231494	H	2905	230543 --- 231225	682	4	28, 207, 249, 459
	AM946981.2	C 2592873 --- 2595778	G	2905	C 2593819---2593137	682	4	28, 207, 249, 459
	4558947 bp (4.56)	C 3285031 --- 3287938	D	2907	C 3285977---3285295	682	4	28, 207, 249, 459
	50.8	3833936 --- 3836841	C	2905	3835894 --- 3836576	682	4	28, 207, 249, 459
		3944336 --- 3947229	A	2903	3946282 --- 3946964	682	2	28, 459
		4076850 --- 4079758	B	2907	4078810 --- 4079492	682	4	28, 207, 249, 459
		4118055 --- 4120960	E	2905	4120013 --- 4120695	682	4	28, 207, 249, 459
17	E.coli IAI1	225118 --- 228021	ECIAI1_23S_3	2903	227074---NONE	682	2	28, 459
	NC_011741.1	C 2793337 --- 2796240	ECIAI1_23S_2	2903	C 2794283---2793601	682	2	28, 459
	CU928160.2	C 3504932 --- 3507835	ECIAI1_23S_1	2903	C 3505878---3505196	682	2	28459
	4700560 bp (4.7)	4020120 --- 4023023	ECIAI1_23S_4	2903	4022076---NONE	682	2	28, 459
	50.8	4117453 --- 4120356	ECIAI1_23S_5	2903	4119409 --- 4120091	682	2	28, 459
		4257786 --- 4260689	ECIAI1_23S_6	2903	4259742 --- 4260424	682	2	28459
		4299169 --- 4302072	ECIAI1_23S_7	2903	4301125---NONE	682	2	28459
18	E.coli HS	225139 --- 228041	EcHS_A4733	2902	227094 --- 227776	682	2	28, 459
	NC_009800.1	C 2765894 --- 2768797	EcHS_A4762	2903	C 2766840---2766158	682	2	28, 459
	CP000802.1	C 3468223 --- 3471126	EcHS_A4784	2903	C 3469169---3468487	682	2	28, 459
	4643538 bp (4.64)	3972115 --- 3975018	EcHS_A4790	2903	3974071 --- 3974753	682	2	28, 459
	50.8	4067777 --- 4070680	EcHS_A4794	2903	4069733 --- 4070415	682	2	28459
		4198222 --- 4201125	EcHS_A4801	2903	4200178 --- 4200860	682	2	28, 459
		4239604 --- 4242507	EcHS_A4806	2903	4241560 --- 4242242	682	2	28459
19	E.coli SE11	227515 --- 230417	ECSE_23SrRNA01	2902	229470 --- NONE	682	2	28, 459
	NC_011415.1	C 2985084 --- 2987986	ECSE_23SrRNA02	2902	C 2986030---2985348	682	2	28, 459
	AP009240.1	C 3686773 --- 3689677	ECSE_23SrRNA03	2904	C 3687721---3687037	684	2	28, 459
	4887515 bp (4.89)	4197853 --- 4200756	ECSE_23SrRNA04	2903	4199809 --- NONE	682	2	28, 459
	50.8	4298026 --- 4300928	ECSE_23SrRNA05	2902	4299981 --- 4300663	682	2	28, 459
		4438212 --- 4441115	ECSE_23SrRNA06	2903	4440168 --- 4440850	682	2	28, 459
		4479681 --- 4482583	ECSE_23SrRNA07	2902	4481636 --- 4482318	682	2	28, 459
20	E.coli SE15	243030 --- 245933	1	2903	244986 --- 245668	682	3.5	28, 249, 459
	AP009378.1	C 2650247 --- 2653150	2	2903	C 2651193---2650511	682	3.5	28, 249, 459
	4717338 bp (4.72)	C 3382605 --- 3385508	3	2903	C 3383551---3382869	682	3.5	28, 249, 459
	50.7	3904658 --- 3907561	4	2903	3906614 --- 3907296	682	3.5	28, 249, 459
		4019171 --- 4022074	5	2903	4021127 --- 4021809	682	3.5	28, 249, 459
		4162110 --- 4165013	6	2903	4164066 --- 4164748	682	3.5	28, 249, 459
		4202285 --- 4205188	7	2903	4204241 --- 4204923	682	3.5	28, 249, 459
21	E.coli ED1a	230487 --- 233390	ECED1_23S_3	2903	232443 --- 233125	682	3.5	28, 249, 459
	NC_011745.1	C 2986612 --- 2989515	ECED1_23S_2	2903	C 2987558---2986876	682	3.5	28, 249, 459
	CU928162.2	C 3865251 --- 3868154	ECED1_23S_1	2903	C 3866197---3865515	682	3.5	28, 249, 459
	5209548 bp (5.21)	4380507 --- 4383410	ECED1_23S_4	2903	4382463 --- 4383145	682	3.5	28, 249, 459
	50.7	4494392 --- 4497295	ECED1_23S_5	2903	4496348 --- 4497030	682	3.5	28, 249, 459
		4629158 --- 4632061	ECED1_23S_6	2903	4631114 --- 4631796	682	3.5	28, 249, 459
		4669328 --- 4672231	ECED1_23S_7	2903	4671284 --- 4671966	682	3.5	28, 249, 459
PATHOGENIC STRAINS
22	E.coli O83:H1 str. NRG 857C	229817 --- 232720	NRG857_r22475	2903	231771 --- 232453	682	2	28, 459
	CP001855.1	C 2714342 --- 2717247	NRG857_r22477	2905	C 2715290---2714608	682	3.5	28, 249, 459
	4747819 bp (4.75)	C 3441201 --- 3444104	NRG857_r22479	2903	C 3442149---3441467	682	2	28, 459
	50.7	3964791 --- 3967696	NRG857_r22481	2905	3966747 --- 3967429	682	3.5	28, 249, 459
		4080622 --- 4083527	NRG857_r22483	2905	4082578 --- 4083260	682	2	28, 459
		4220923 --- 4223828	NRG857_r22485	2905	4222879 --- 4223561	682	3.5	28, 249, 459
		4261093 --- 4263998	NRG857_r22487	2905	4263049 --- 4263731	682	3.5	28, 249, 459
23	E.coli LF82	229475 --- 232376	H	2901	231429 --- 232111	682	2	28, 459
	CU651637.1	C 2706504 --- 2709407	G	2903	C 2707450---2706768	682	3.5	28, 249, 459
	4630707 bp (4.77)	C 3466973 --- 3469874	D	2901	C 3467919---3467237	682	2	28, 459
	50.7	3989732 --- 3992635	C	2903	3991688 --- 3992370	682	3.5	28, 249, 459
		4105563 --- 4108466	A	2903	4107519 --- 4108201	682	4	28, 207, 249, 459
		4245865 --- 4248768	B	2903	4247821 --- 4248503	682	3.5	28, 249, 459
		4286035 --- 4288938	E	2903	4287991 --- 4288673	682	3.5	28, 249, 459
24	E.coli UM146	768962 --- 771867	UM146_r24019	2905	770918 --- 771600	682	3.5	28, 249, 459
	CP002167.1	C 3383726 --- 3386631	UM146_r24021	2905	C 3384674---3383992	682	3.5	28, 249, 459
	4993013 bp (4.99)	C 3435473 --- 3438378	UM146_r24023	2905	C 3436421---3435739	682	3.5	28, 249, 459
	50.6	3946633 --- 3949538	UM146_r24025	2905	3948589 --- 3949271	682	3.5	28, 249, 459
		4065133 --- 4068038	UM146_r24027	2905	4067089 --- 4067771	682	3.5	28, 249, 459
		4199541 --- 4202446	UM146_r24029	2905	4201497 --- 4202179	682	3.5	28, 249, 459
		4991251 --- 4993013	UM146_r24031	1762	NONE	-	-	-
25	E.coli O26:H11 str. 11368	229530 --- 232433	H	2903	231486 --- 232168	682	2	28, 459
	NC_013361.1	C 3575218 --- 3578121	G	2903	C 3576164---3575482	682	2	28, 459
	AP010953.1	C 4357077 --- 4359982	D	2905	C 4358023---4357341	682	2	28, 459
	5697240 bp (5.7)	C 4739501 --- 4742404	A	2903	C 4740447---4739765	682	2	28, 459
	50.7	C 4836897 --- 4839800	C	2903	C 4837843---4837161	682	2	28, 459
		5134151 --- 5137054	B	2903	5136107 --- 5136789	682	2	28, 459
		5175532 --- 5178437	E	2905	5177490 --- 5178172	682	2	28, 459
26	E.coli O103:H2 str. 12009	226270 --- 229175	H	2905	228228 --- NONE
	NC_013353.1	C 3214310 --- 3217213	G	2903	C 3215256---3214574	682	2	28, 459
	AP010958.1	C 4100644 --- 4103549	D	2905	C 4101590---4100908	682	3	28, 207, 459
	5449314 bp (5.45)	C 4419078 --- 4421983	A	2905	C 4420024---4419342	682	3	28, 207, 459
	50.7	C 4516454 --- 4519359	C	2905	C 4517400---4516718	682	2	28, 459
		4879108 --- 4882013	B	2905	4881066 --- 4881748	682	3	28, 207, 459
		4919570 --- 4922475	E	2905	4921528 --- 4922210	682	3	28, 207, 459
27	E.coli O111:H- str. 11128	227059 --- 229964	H	2905	229017 --- 229699	682	2	28, 459
	NC_013364.1	C 3286863 --- 3289766	G	2903	C 3287809---3287127	682	2	28, 459
	AP010960.1	C 4094782 --- 4097687	D	2905	C 4095728---4095046	682	2	28, 459
	5371077 bp (5.37)	4620032 --- 4622935	C	2903	4621988 --- 4622670	682	2	28, 459
	50.6	4717400 --- 4720303	A	2903	4719356 --- 4720038	682	2	28, 459
		4855838 --- 4858743	B	2905	4857796 --- 4858478	682	2	28, 459
		4897219 --- 4900124	E	2905	4899177 --- 4899859	682	2	28, 459
28	E.coli O127:H6 str. E2348/69	235714 --- 238617	H	2903	237670 --- 238352	682	4	28, 207, 249, 459
	NC_011601.1	C 2957273 --- 2960176	G	2903	C 2958219---2957537	682	4	28, 207, 249, 459
	FM180568.1	C 3693117 --- 3696020	D	2903	4242277 --- 4242959	682	4	28, 207, 249, 459
	4965553 bp (4.97)	4240321 --- 4243224	C	2903	4355751 --- 4356433	682	4	28, 207, 249, 459
	50.6	4353795 --- 4356698	A	2903	4501153 --- 4501835	682	4	28, 207, 249, 459
		4499197 --- 4502100	B	2903	4541427 --- 4542109	682	4	28, 207, 249, 459
		4539471 --- 4542374	E	2903	C 3694063---3693381	682	4	28, 207, 249, 459
29	E.coli O55:H7 str. CB9615	229050 --- 231952	G2583_0208	2902	231005 --- 231687	682	2	28, 459
	NC_013941.1	C 3229024 --- 3231926	G2583_3172	2902	C 3229970---3229288	682	2	28, 459
	CP001846.1	C 4047613 --- 4050515	G2583_3994	2902	C 4048559---4047877	682	2	28, 459
	5386352 bp (5.39)	4624669 --- 4627572	G2583_4554	2903	4626625 --- 4627307	682	2	28, 459
	50.8	4720917 --- 4723819	G2583_4652	2902	4722872 --- 4723554	682	2	28, 459
		4865465 --- 4868367	G2583_4785	2902	4867420 --- 4868102	682	2	28, 459
		4906479 --- 4909381	G2583_4827	2902	4908434 --- 4909116	682	2	28, 459
30	E.coli O55:H7 str. RM12598	229040---231944	ECO55CA74_r25336	2904	230995---231677	682	2	28, 459
	NC_017656.1	C 3197775---3200679	ECO55CA74_r25338	2904	C 3198041---3198723	682	2	28, 459
	CP003109.1	C 3956092---3958996	ECO55CA74_r25340	2904	C 3956358---3957040	682	2	28, 459
	5263980bp (5.26)	4533101---4536007	ECO55CA74_r25342	2906	4535058---4535740	682	2	28, 459
	50.4	4629339---4632243	ECO55CA74_r25344	2904	4631294---4631976	682	2	28, 459
		4773794---4776698	ECO55CA74_r25346	2904	4775749---4776431	682	2	28, 459
		4814818---4817722	ECO55CA74_r25348	2904	4816773---4817455	682	2	28, 459
31	E.coli O157:H7 str. EDL933	229091 --- 231993	H	2902	231046 --- 231728	682	2	28, 459
	NC_002655.2	C 3516316 --- 3519223	G	2907	C 3517262---3516580	682	2	28, 459
	AE005174.2	C 4226104 --- 4229009	D	2905	C 4227050---4226368	682	2	28, 459
	5528445 bp (5.53)	4806128 --- 4809032	C	2904	4808085 --- 4808767	682	2	28, 459
	50.4	4902406 --- 4905310	A	2904	4904363 --- 4905045	682	2	28, 459
		5046586 --- 5049490	B	2904	5048543 --- 5049225	682	2	28, 459
		5087595 --- 5090497	E	2902	5089550 --- 5090232	682	2	28, 459
32	E.coli O157:H7 str. EC4115	229071 --- 231975	ECH74115_0216	2904	231028 --- 231710	682	2	28, 459
	NC_011353.1	C 3550593 --- 3553489	ECH74115_3827	2896	C 3551539---3550857	682	2	28, 459
	CP001164.1	C 4261965 --- 4264867	ECH74115_4596	2902	C 4262911---4262229	682	2	28, 459
	5572075 bp (5.57)	4840243 --- 4843148	ECH74115_5195	2905	4842201 --- 4842883	682	2	28, 459
	50.5	4936757 --- 4939661	ECH74115_5294	2904	4938714 --- 4939396	682	2	28, 459
		5080936 --- 5083840	ECH74115_5435	2904	5082893 --- 5083575	682	2	28, 459
		5121962 --- 5124866	ECH74115_5480	2904	5123919 --- 5124601	682	2	28, 459
33	E.coli O157:H7 str. Sakai	229090 --- 231992	H	2902	231045 --- 231727	682	2	28, 459
	NC_002695.1	C 3446478 --- 3449380	G	2902	C 3447424---3446742	682	2	28, 459
	BA000007.2	C 4158885 --- 4161787	D	2902	C 4159831---4159149	682	2	28, 459
	5498450 bp (5.5)	4737148 --- 4740052	C	2904	4739105 --- 4739787	682	2	28, 459
	50.5	4833642 --- 4836546	A	2904	4835599 --- 4836281	682	2	28, 459
		4977823 --- 4980727	B	2904	4979780 --- 4980462	682	2	28, 459
		5018849 --- 5021753	E	2904	5020806 --- 5021488	682	2	28, 459
34	E.coli O157:H7 str. TW14359	229071 --- 231975	ECSP_0203	2904	231028 --- 231710	682	2	28, 459
	NC_013008.1	C 3505464 --- 3508366	ECSP_3536	2902	C 3506410---3505728	682	2	28, 459
	CP001368.1	C 4218006 --- 4220908	ECSP_4246	2902	C 4218952---4218270	682	2	28, 459
	5528136 bp (5.53)	4796286 --- 4799190	ECSP_4809	2904	4798243 --- 4798925	682	2	28, 459
	50.5	4892817 --- 4895721	ECSP_4907	2904	4894774 --- 4895456	682	2	28, 459
		5036996 --- 5039900	ECSP_5041	2904	5038953 --- 5039635	682	2	28, 459
		5078022 --- 5080926	ECSP_5079	2904	5079979 --- 5080661	682	2	28, 459
35	Xuzhou21	229090---231992	CDCO157_23S01	2902	231045---231727	682	2	28, 459
	NC_017906.1	C 3374113---3377015	CDCO157_23S02	2902	C 3374377---3375059	682	2	28, 459
	CP001925.1	C 4086145---4089047	CDCO157_23S03	2902	C 4086409---4087091	682	2	28, 459
	5386223 bp (5.4)	4664130---4667034	CDCO157_23S04	2904	4666087---4666769	682	2	28, 459
	50.4	4760394---4763298	CDCO157_23S05	2904	4762351----4763033	682	2	28, 459
		4904562---4907466	CDCO157_23S06	2904	4906519---4907201	682	2	28, 459
		4945588---4948492	CDCO157_23S07	2904	4947545---4948227	682	2	28, 459
36	E.coli ABU 83972	233030 --- 235933	A	2903	234986 --- 235668	682	3.5	28, 249, 459
	CP001671.1	C 2959611 --- 2962516	B	2905	C 2960557---2959875	682	3.5	28, 249, 459
	5131397 bp (5.13)	C 3759626 --- 3762529	C	2903	C 3760572---3759890	682	3.5	28, 249, 459
	50.6	4313574 --- 4316483	D	2909	4315530 --- 4316218	688	3.5	28, 249, 459
		4432012 --- 4434916	E	2904	4433968 --- 4434651	683	3.5	28, 249, 459
		4569819 --- 4572721	F	2902	4571774 --- 4572456	682	3.5	28, 249, 459
		4609989 --- 4612892	G	2903	4611945 --- 4612627	682	3.5	28, 249, 459
37	E.coli NA114	218819 --- 221726	ECNA114_23sr1	2907	220777 --- 221459	682	3.5	28, 249, 459
	CP002797.1	C 2727777 --- 2730684	ECNA114_23sr2	2907	C 2728725---2728043	682	3.5	28, 249, 459
	4935241bp (4.94)	C 3439151 --- 3442058	ECNA114_23sr3	2907	C 3440099---3439417	682	3.5	28, 249, 459
	51.2	C 3520653 --- 3523560	ECNA114_23sr4	2907	C 3521601---3520919	682	3.5	28, 249, 459
		4022213 --- 4025120	ECNA114_23sr5	2907	4024171 --- 4024853	682	3.5	28, 249, 459
		4288980 --- 4291887	ECNA114_23sr6	2907	4290938 --- 4291620	682	3.5	28, 249, 459
		4875501 --- 4878408	ECNA114_23sr7	2907	4877459 --- 4878141	682	3.5	28, 249, 459
38	E.coli 536	229827 --- 232730	ECP_4735	2903	231783 --- 232465	682	3.5	28, 249, 459
	NC_008253.1	C 2734223 --- 2737126	ECP_4733	2903	C 2735169---2734487	682	3.5	28, 249, 459
	CP000247.1	C 3533604 --- 3536508	ECP_4744	2904	C 3534550---3533868	682	3.5	28, 249, 459
	4938920 bp (4.94)	4127494 --- 4130397	ECP_4748	2903	4129450 --- 4130132	682	3.5	28, 249, 459
	50.8	4243380 --- 4246283	ECP_4741	2903	4245336 --- 4246018	682	3.5	28, 249, 459
		4380764 --- 4383667	ECP_4751	2903	4382720 --- 4383402	682	3.5	28, 249, 459
		4420935 --- 4423838	ECP_4738	2903	4422891 --- 4423573	682	3.5	28, 249, 459
39	E.coli UTI89	230503 --- 233406	H	2903	232459 --- 233141	682	3.5	28, 249, 459
	NC_007946.1	C 2870559 --- 2873462	G	2903	C 2871505---2870823	682	3.5	28, 249, 459
	CP000243.1	C 3641673 --- 3644576	D	2903	C 3642619---3641937	682	3.5	28, 249, 459
	5065741 bp (5.07)	C 3693402 --- 3696305	E	2903	C 3694348---3693666	682	3.5	28, 249, 459
	50.6	4204572 --- 4207475	C	2903	4206528 --- 4207210	682	3.5	28, 249, 459
		4323846 --- 4326749	A	2903	4325802 --- 4326484	682	3.5	28, 249, 459
		4458263 --- 4461166	B	2903	4460210 --- 4460901	691	3.5	28, 249, 459
40	E.coli CFT073	237160 --- 240063	H	2903	239116 --- 239798	682	2	28, 459
	NC_004431.1	C 2988973 --- 2991877	G	2904	C 2989920---2989237	683	3.5	28, 249, 459
	AE014075.1	C 3855236 --- 3858140	D	2904	C 3856181---3855499	682	3.5	28, 249, 459
	5231428 bp (5.23)	4444737 --- 4447644	C	2907	4446697 --- 4447379	682	3.5	28, 249, 459
	50.5	4563174 --- 4566081	A	2907	4565134 --- 4565816	682	3.5	28, 249, 459
		4701054 --- 4703957	B	2903	4703010 --- 4703692	682	3.5	28, 249, 459
		4741226 --- 4744132	E	2906	4743185 --- 4743867	682	3.5	28, 249, 459
41	E.coli IAI39	C 477613 --- 480516	ECIAI29_23S_4	2903	C 478559---477877	682	4	28, 207, 249, 459
	NC_011750.1	C 2902235 --- 2905138	ECIAI29_23S_5	2903	C 2903181---2902499	682	4	28, 207, 249, 459
	CU928164.2	C 3134459 --- 3137362	ECIAI29_23S_3	2903	C 3135405---3134723	682	4	28, 207, 249, 459
	5132068 bp (5.13)	C 3279707 --- 3282610	ECIAI29_23S_2	2903	C 3280653---3279971	682	4	28, 207, 249, 459
	50.6	C 3938256 --- 3941159	ECIAI29_23S_1	2903	C 3939202---3938520	682	4	28, 207, 249, 459
		4548651 --- 4551554	ECIAI29_23S_6	2903	4550607 --- 4551289	682	4	28, 207, 249, 459
		4595193 --- 4598096	ECIAI29_23S_7	2903	4597149 --- 4597831	682	4	28, 207, 249, 459
42	E.coli str. 'clone D i2'	232919 --- 235822	i02_r002	2903	234875 --- 235557	682	3.5	28, 249, 459
	CP002211.1	C 2926054 --- 2928957	i02_r005	2903	C 2927000---2926318	682	3.5	28, 249, 459
	5038386 bp (5.04)	C 3726298 --- 3729201	i02_r008	2903	C 3727244---3726562	682	3.5	28, 249, 459
	50.6	4266668 --- 4269571	i02_r011	2903	4268624 --- 4269306	682	3.5	28, 249, 459
		4385009 --- 4387912	i02_r014	2903	4386965 --- 4387647	682	3.5	28, 249, 459
		4522882 --- 4525785	i02_r017	2903	4524838 --- 4525520	682	3.5	28, 249, 459
		4563053 --- 4565956	i02_r020	2903	4565009 --- 4565691	682	3.5	28, 249, 459
43	E.coli str. 'clone D i14'	232919 --- 235822	il4_r002	2903	234875 --- 235557	682	3.5	28, 249, 459
	CP002212.1	C 2926054 --- 2928957	il4_r005	2903	C 2927000---2926318	682	3.5	28, 249, 459
	5038386 bp (5.04)	C 3726298 --- 3729201	il4_r008	2903	C 3727244---3726562	682	3.5	28, 249, 459
	50.6	4266668 --- 4269571	il4_r011	2903	4268624 --- 4269306	682	3.5	28, 249, 459
		4385009 --- 4387912	il4_r014	2903	4386965 --- 4387647	682	3.5	28, 249, 459
		4522882 --- 4525785	il4_r017	2903	4524838 --- 4525520	682	3.5	28, 249, 459
		4563053 --- 4565956	il4_r020	2903	4565009 --- 4565691	682	3.5	28, 249, 459
44	E.coli S88	230502 --- 233405	ECS88_23S_3	2903	232458 --- 233140	682	3.5	28, 249, 459
	NC_011742.1	C 2768801 --- 2771704	ECS88_23S_2	2903	C 2769747---2769065	682	3.5	28, 249, 459
	CU928161.2	C 3629378 --- 3632281	ECS88_23S_1	2903	C 3630324---3629642	682	3.5	28, 249, 459
	5032268 bp (5.03)	4152077 --- 4154980	ECS88_23S_4	2903	4154033 --- 4154715	682	3.5	28, 249, 459
	50.7	4270413 --- 4273316	ECS88_23S_5	2903	4272369 --- 4273051	682	3.5	28, 249, 459
		4404928 --- 4407831	ECS88_23S_6	2903	4406884 --- 4407566	682	3.5	28, 249, 459
		4445098 --- 4448001	ECS88_23S_7	2903	4447054 --- 4447736	682	3.5	28, 249, 459
45	E.coli IHE3034	230419 --- 233322	A	2903	232375 --- 233057	682	3.5	28, 249, 459
	CP001969.1	C 3024072 --- 3026975	B	2903	C 3025018---3024336	682	3.5	28, 249, 459
	5108383 bp (5.11)	C 3794750 --- 3797653	C	2903	C 3795696---3795014	682	3.5	28, 249, 459
	50.7	4317465 --- 4320368	D	2903	4319421 --- 4320103	682	3.5	28, 249, 459
		4435968 --- 4438871	E	2903	4437924 --- 4438606	682	3.5	28, 249, 459
		4570385 --- 4573288	F	2903	4572341 --- 4573023	682	3.5	28, 249, 459
		4610554 --- 4613457	G	2903	4612510 --- 4613192	682	3.5	28, 249, 459
46	E.coli O7:K1 str. CE10	235666 --- 238569	CE10_0209	2903	237622 --- 238304	682	4	28, 207, 249, 459
	CP003034.1	C 3088052 --- 3090955	CE10_3024	2903	C 3088998---3088316	682	4	28, 207, 249, 459
	5313531 bp (5.31)	C 3884676 --- 3887579	CE10_3811	2903	C 3885622---3884940	682	4	28, 207, 249, 459
	50.6	4490132 --- 4493035	CE10_4404	2903	4492088 --- 4492770	682	4	28, 207, 249, 459
		4599048 --- 4601951	CE10_4512	2903	4601004 --- 4601686	682	4	28, 207, 249, 459
		4742903 --- 4745806	CE10_4645	2903	4744859 --- 4745541	682	4	28, 207, 249, 459
		4789482 --- 4792385	CE10_4690	2903	4791438 --- 4792120	682	4	28, 207, 249, 459
47	E.coli UMN026	228609 --- 231513	ECUMN_23S_3	2904	230566 --- 231248	682	3.5	28, 249, 459
	NC_011751.1	C 3019276 --- 3022180	ECUMN_23S_2	2904	C 3020222---3019540	682	3.5	28, 249, 459
	CU928163.2	C 3870131 --- 3873035	ECUMN_23S_1	2904	C 3871077---3870395	682	3.5	28, 249, 459
	5202090 bp (5.2)	4430571 --- 4433474	ECUMN_23S_4	2903	4432527 --- 4433209	682	3.5	28, 249, 459
	50.7	4524177 --- 4527078	ECUMN_23S_5	2901	4526131 --- 4526813	682	3.5	28, 249, 459
		4657941 --- 4660845	ECUMN_23S_6	2904	4659898 --- 4660580	682	3.5	28, 249, 459
		4699035 --- 4701939	ECUMN_23S_7	2904	4700992 --- 4701674	682	3.5	28, 249, 459
48	E.coli APEC O1	230474 --- 233387	APEC01_r02	2913	232430 --- 233120	690	2	28, 467
	NC_008563.1	C 2885478 --- 2888384	APEC01_r05	2906	C 2886426---2885744	682	3.5	28, 249, 459
	CP000468.1	C 3714583 --- 3717491	APEC01_r09	2908	C 3715531---3714849	682	3.5	28, 249, 459
	5082025 bp (5.08)	4237369 --- 4240274	APEC01_r12	2905	4239325 --- 4240007	682	3.5	28, 249, 459
	50.5	4355855 --- 4358763	APEC01_r15	2908	4357814 --- 4358496	682	3.5	28, 249, 459
		4490375 --- 4493292	APEC01_r18	2917	4492331 --- 4493025	694	4	28, 254, 406, 471
		4530563 --- 4533475	APEC01_r21	2912	4532522 --- 4533208	686	3.5	28, 250, 463
49	E.coli 042	230608 --- 233513	-	2905	232566 --- 233248	682	3.5	28, 249, 459
	FN554766.1	C 2982263 --- 2985166	-	2903	C 2983209---2982527	682	2	28, 459
	5241977 bp (5.24)	C 3785216 --- 3788143	-	2927	C 3786184---3785502	682	3.5	28, 249, 459
	50.6	4409264 --- 4412180	-	2916	4411222 --- 4411904	682	2	28, 459
		4509888 --- 4512797	-	2909	4511843 --- 4512525	682	2	28, 459
		4643198 --- 4646108	-	2910	4645154 --- 4645836	682	3.5	28, 249, 459
		4684440 --- 4687352	-	2912	4686398 --- 4687080	682	2	28, 459
50	E.coli 55989	226254 --- 229157	EC55989_23S_3	2903	228210 --- 228892	682	2	28, 459
	NC_011748.1	C 2949519 --- 2952422	EC55989_23S_2	2903	C 2950465---2949783	682	2	28, 459
	CU928145.2	C 3773511 --- 3776414	EC55989_23S_1	2903	C 3774457---3773775	682	2	28, 459
	5154862 bp (5.15)	4323997 --- 4326900	EC55989_23S_4	2903	4325953 --- 4326635	682	2	28, 459
	50.7	4421386 --- 4424288	EC55989_23S_5	2902	4423341 --- 4424023	682	2	28, 459
		4558500 --- 4561403	EC55989_23S_6	2903	4560456 --- 4561138	682	2	28, 459
		4599881 --- 4602784	EC55989_23S_7	2903	4601837 --- 4602519	682	2	28, 459
51	E.coli 104 :H4 2009EL-2050	531396---534303	O3M_r25482	2907	522024---522706	682	2	28, 459
	NC_018650.1	1334220---1337127	O3M_r25484	2907	1325918---1326600	682	2	28, 459
	CP003297.1	C 4199095---4202001	O3M_r25486	2906	C 4199361---4200043	682	2	28, 459
	5253138 bp (5.2)	C 4909128---4912038	O3M_r25488	2910	C 4909394---4910081	682	2	28, 459
	50.7	C 4950518---4953423	O3M_r25490	2905	C 4950784---4951466	682	2	28, 459
		C 5087722---5090627	O3M_r25492	2905	C 5087988---5088670	682	2	28, 459
		C 5185159---5188064	O3M_r25494	2905	C 5185425---5186107	682	2	28, 459
52	E.coli 104 :H4 2009EL-2071	520068---522973	O3O_r25862	2905	522024---522706	682	2	28, 459
	NC_018661.1	1323962---1326867	O3O_r25860	2905	1325918---1326600	682	2	28, 459
	CP003301.1	C 4258067---4260972	O3O_r25858	2905	C 4258333---4259015	682	2	28, 459
	5312586 bp (5.3)	C 4968653---4971557	O3O_r25856	2904	C 4968919---4969601	682	2	28, 459
	50.7	C 5010033---5012938	O3O_r25854	2905	C 5010299---5010981	682	2	28, 459
		C 5147152---5150056	O3O_r25852	2904	C 5147118---5147800	682	2	28, 459
		C 5244588---5247492	O3O_r25850	2904	C 5244854---5245536	682	2	28, 459
53	E.coli 104 :H4 2011-3493	526769---529675	"O3K_r25560"	2906	528725---529407	682	2	28, 459
	NC_018658.1	1330209---1333114	O3K_r25562	2905	1332165---1332847	682	2	28, 459
	CP003289.1	C 4221386---4224291	O3K_r25564	2905	C 4221652---4222334	682	2	28, 459
	5273097 bp (5.3)	C 4928903---4931808	O3K_r25566	2905	C 4929169---4929851	682	2	28, 459
	50.6	C 4970377---4973282	O3K_r25568	2905	C 4970643---4971325	682	2	28, 459
		C 5107587---5110492	O3K_r25570	2905	C 5107853---5108535	682	2	28, 459
		C 5205025---5207930	O3K_r25572	2905	C 5205291---5205973	682	2	28, 459
54	E.coli ETEC H10407	229027 --- 231930	-	2903	230983 --- 231665	682	1	28
	FN649414.1	C 3021873 --- 3024776	-	2903	C 3022819---3022137	682	2	28, 459
	5153435 bp (5.15)	C 4365875 --- 4368789	-	2914	4367831 --- 4368513	682	2	28, 459
	50.8	4459638 --- 4462541	-	2903	4461594 --- 4462276	682	2	28, 459
		4591062 --- 4593967	-	2905	4593020 --- 4593702	682	2	28, 459
		4630545 --- 4632086	-	1541	NONE
		4632441 --- 4635353	-	2912	4634399 --- 4635081	682	2	28, 459
55	E.coli E24377A	227600 --- 230523	A	2923	229576-----NONE	-	-	-
	NC_009801.1	C 2875908 --- 2878833	B	2925	2876854---2876172	682	2	28, 459
	CP000800.1	C 3753685 --- 3756608	C	2923	C 3754631--- NONE	-	-	-
	4979619 bp (4.98)	4265581 --- 4268504	D	2923	4267557----NONE	-	-	-
	50.6	4362881 --- 4365804	E	2923	4364857---NONE	-	-	-
		4505647 --- 4508570	F	2923	4507623-----NONE	-	-	-
		4547028 --- 4549951	G	2923	4549004-----NONE	-	-	-
56	E.coli UMNK88	228586 --- 231489	UMNK88_r02	2903	230542 --- 231224	682	2	28, 459
	CP002729.1	C 3138250 --- 3141153	UMNK88_r05	2903	C 3139196---3138514	682	2	28, 459
	5186416 bp (5.19)	C 3911264 --- 3914167	UMNK88_r09	2903	C 3912210---3911528	682	2	28, 459
	50.7	4446630 --- 4449531	UMNK88_r12	2901	4448584 --- 4449266	682	2	28, 459
		4554541 --- 4557444	UMNK88_r15	2903	4556497 --- 4557179	682	2	28, 459
		4687143 --- 4690046	UMNK88_r18	2903	4689099 --- 4689781	682	2	28, 459
		4728612 --- 4731515	UMNK88_r21	2903	4730568 --- 4731250	682	2	28, 459
57	E.coli SMS-3-5	234886 --- 237789	EcSMS5_0218	2903	236842 --- 237524	682	4	28, 207, 249, 459
	NC_010498.1	C 2821325 --- 2824229	EcSMS5_2742	2904	C 2822271---2821589	682	4	28, 207, 249, 459
	CP000970.1	C 3651109 --- 3654010	EcSMS5_3570	2901	C 3652055---3651373	682	4	28, 207, 249, 459
	5068389 bp (5.07)	4223489 --- 4226394	EcSMS5_4127	2905	4225447 --- 4226129	682	4	28, 207, 249, 459
	50.5	4332472 --- 4335376	EcSMS5_4235	2904	4334429 --- 4335111	682	4	28, 207, 249, 459
		4514378 --- 4517282	EcSMS5_4418	2904	4516335 --- 4517017	682	4	28, 207, 249, 459
		4554549 --- 4557452	EcSMS5_4461	2903	4556505 --- 4557187	682	4	28, 207, 249, 459
	Type - I	Type - II	Type - III	Type - IV
